1 **Title:** Yersiniabactin producing AIEC promote inflammation-associated fibrosis in  
2 gnotobiotic *Il10*<sup>-/-</sup> mice

3  
4 Melissa Ellermann<sup>1</sup>, Raad Z Gharaibeh<sup>4</sup>, Laura Fulbright<sup>1</sup>, Belgin Dogan<sup>6</sup>, Lyndsey N  
5 Moore<sup>1</sup>, Christopher A. Broberg<sup>1</sup>, Lacey R. Lopez<sup>1</sup>, Aaron M. Rothemich<sup>1</sup>, Jeremy W  
6 Herzog<sup>2</sup>, Allison Rogala<sup>2</sup>, Ilyssa O. Gordon<sup>7</sup>, Florian Rieder<sup>8, 9</sup>, Cory R. Brouwer<sup>10</sup>,  
7 Kenneth W. Simpson<sup>6</sup>, Christian Jobin<sup>4, 5</sup>, R Balfour Sartor<sup>1, 2</sup>, Janelle C Arthur<sup>1, 2, 3, \*</sup>

8  
9 Department of Microbiology and Immunology<sup>1</sup>, Center for Gastrointestinal Biology and  
10 Disease<sup>2</sup>, Lineberger Comprehensive Cancer Center<sup>3</sup>, University of North Carolina at  
11 Chapel Hill, NC, USA.

12 Department of Medicine<sup>4</sup>, Department of Infectious Diseases and Pathology<sup>5</sup>, University  
13 of Florida, Gainesville, FL, USA.

14 Department of Clinical Sciences<sup>6</sup>, College of Veterinary Medicine, Cornell University,  
15 Ithaca, NY, USA.

16 Department of Pathology, Robert J. Tomsich Pathology and Laboratory Medicine  
17 Institute<sup>7</sup>, Department of Gastroenterology, Hepatology and Nutrition, Digestive  
18 Diseases and Surgery Institute<sup>8</sup>, Department of Inflammation and Immunity, Lerner  
19 Research Institute<sup>9</sup>, Cleveland Clinic Foundation, Cleveland, USA.

20 Department of Bioinformatics and Genomics<sup>10</sup>, University of North Carolina at Charlotte,  
21 Charlotte, NC, USA.

22

23 \*Address correspondence to Janelle C Arthur, [janelle\\_arthur@med.unc.edu](mailto:janelle_arthur@med.unc.edu). University  
24 of North Carolina at Chapel Hill, 125 Mason Farm Rd, Chapel Hill, NC, 27713, USA.

25

## 26 **Declaration of interests**

27 The authors declare no competing interests.

28

## 29 **Abstract**

30 Fibrosis is a significant complication of intestinal disorders associated with microbial  
31 dysbiosis and pathobiont expansion, notably Crohn's disease (CD). Mechanisms that  
32 favor fibrosis are not well understood and therapeutic strategies are limited. Here we  
33 demonstrate that colitis susceptible *I10*-deficient mice develop inflammation-associated  
34 fibrosis when mono-associated with adherent/invasive *Escherichia coli* (AIEC) that  
35 harbor the yersiniabactin (Ybt) pathogenicity island. Inactivation of Ybt siderophore  
36 production in AIEC nearly abrogated fibrosis development in inflamed mice. In contrast,  
37 inactivation of Ybt import through its cognate receptor FyuA enhanced fibrosis severity.  
38 This corresponded with increased colonic expression of profibrogenic genes prior to the  
39 development of histological disease, therefore suggesting causality. *FyuA*-deficient  
40 AIEC also exhibited greater localization within sub-epithelial tissues and fibrotic lesions  
41 that was dependent on Ybt biosynthesis and corresponded with increased fibroblast  
42 activation *in vitro*. Together, these findings suggest that Ybt establishes a pro-fibrotic  
43 environment in the host in the absence of binding to its cognate receptor and indicates a  
44 direct link between intestinal AIEC and the induction of inflammation-associated fibrosis.

45

46 **Keywords:** Fibrosis, AIEC, Crohn's disease, colitis, microbiome, yersiniabactin

## 47 **Introduction**

48           Inflammatory bowel diseases (IBD), including Crohn's disease (CD), are  
49 characterized by chronic intestinal inflammation that develops as a result of prolonged  
50 and inappropriate mucosal immune responses to luminal antigens in genetically  
51 susceptible individuals (1). The chronic and relapsing nature of IBD, in conjunction with  
52 the lack of curative therapies for many patients, enhances risk for inflammation-  
53 associated comorbidities including intestinal fibrosis (2). Approximately 30% of CD  
54 patients develop fibrotic disease that can result in intestinal strictures and bowel  
55 obstructions (2) (3) (4). Current treatments for intestinal fibrosis are inadequate and rely  
56 on anti-inflammatory therapies (which are often ineffective) and surgical interventions  
57 (3). Fibrosis is recurrent in large proportions of the CD population (4), thus necessitating  
58 the development of specific anti-fibrotic therapeutics.

59           Fibrosis is characterized by excess accumulation of extracellular matrix (ECM)  
60 components that results in the pathological remodeling of tissues and consequent organ  
61 dysfunction. Mesenchymal cells such as fibroblasts, myofibroblasts and smooth muscle  
62 cells become highly activated in response to transmural injury or inflammation and  
63 hypersecrete ECM components and profibrogenic factors that further propagate fibrotic  
64 processes. The tissue microenvironment also plays an important role in modulating the  
65 activity of mesenchymal cells, where host-derived signals such as cytokines and growth  
66 factors serve as additional fibrogenic or antifibrotic mediators (4) (3). Activation of  
67 mesenchymal cells is also subject to regulation by microbial factors (5) (6). Fibrosis can  
68 occur in bacterial-induced models of acute colitis including mice chronically colonized  
69 with the enteric pathogen *Salmonella enterica* or with a CD-associated *Escherichia coli*

70 pathobiont (7) (8). Importantly, progression from intestinal inflammation to inflammation-  
71 associated fibrosis is incompletely penetrant in bacterial-induced colitis models and in  
72 clinical populations with microbial-driven diseases like IBD. It remains unclear which  
73 microbiota-derived signals favor the establishment of a profibrogenic microenvironment.

74         The intestinal microbiota are key modulators of mucosal immunity under  
75 homeostatic conditions and in numerous inflammatory pathologies including IBD (1). A  
76 subset of resident intestinal *E. coli* known as adherent and invasive *E. coli* (AIEC) are  
77 enriched in CD patients (9) (10) (11). AIEC breach the intestinal epithelium and induce  
78 inflammation in various rodent models of experimental colitis (12) (13) (14) (15).  
79 Colonization of germ free, inflammation-prone *Il10<sup>-/-</sup>* mice with AIEC induces aggressive,  
80 transmural intestinal inflammation driven by bacterial antigen-specific T-helper-(Th)1  
81 and Th17 immune responses (13) (16). Studies in germ free *Il10<sup>-/-</sup>* mice individually  
82 colonized with AIEC have led to the identification of several bacterial factors that  
83 augment or diminish the colitis-inducing and pro-carcinogenic capabilities of AIEC (17)  
84 (18) (19) (20).

85         Comparative phylogenetic studies have demonstrated that the yersiniabactin  
86 (Ybt) high pathogenicity island (HPI) is overrepresented in human, canine and murine  
87 AIEC strains (21). The Ybt HPI encodes enzymatic machinery required for the  
88 biosynthesis of the siderophore Ybt (22). Once Ybt is released from bacterial cells, it  
89 sequesters extracellular metals including iron, zinc and copper. The Ybt-metal chelate is  
90 subsequently imported through its cognate outer membrane receptor FyuA for bacterial  
91 use (22) (23) (24). The Ybt HPI is harbored by numerous Enterobacteriaceae  
92 pathogens and contributes to *in vivo* fitness, niche formation, and virulence (25) (26)

93 (27). However, the contribution of the Ybt HPI to the proinflammatory potential of  
94 resident intestinal *E. coli* such as AIEC has not been explored, despite its prevalence in  
95 this population. We therefore utilized our gnotobiotic *I10*<sup>-/-</sup> mouse model to investigate  
96 whether inactivation of the Ybt system in AIEC modulates immune-mediated colitis.  
97 While abrogation of Ybt biosynthesis in AIEC delayed colitis onset, colonization of mice  
98 with Ybt-positive AIEC was associated with the development of inflammation-associated  
99 fibrosis. Severity of fibrosis was enhanced in mice colonized with the Ybt-positive  
100 transport mutant ( $\Delta$ *fyuA*), which corresponded with increased profibrogenic gene  
101 signatures in the colon and in cultured fibroblasts and enhanced AIEC subepithelial  
102 localization within fibrotic lesions. Abrogation of Ybt biosynthesis in  $\Delta$ *fyuA* attenuated  
103 fibrosis in inflamed mice, restored AIEC localization to the epithelium and reduced  
104 fibroblast activation. Collectively, our findings introduce a non-canonical role for Ybt in  
105 mediating fibrosis development independent of its established function in delivering iron  
106 to bacteria through FyuA. More broadly, we introduce a novel microbial-driven, immune-  
107 mediated model of inflammation-associated fibrosis that recapitulates key  
108 histopathological features of fibrotic disease in human CD.

109

## 110 **Results**

### 111 **Inactivation of Ybt biosynthesis, but not Ybt transport, in AIEC delays**

112 **progression of colitis.** The siderophore Ybt and its cognate receptor FyuA mediate  
113 bacterial metal acquisition in pathogenic Enterobacteriaceae. Because the Ybt HPI is  
114 also harbored by many IBD-associated AIEC strains, we hypothesized that like its  
115 pathogenic counterparts, the Ybt HPI enhances the proinflammatory potential of AIEC.

116 To determine whether an intact Ybt siderophore system in AIEC contributes to colitis  
117 development, we inactivated Ybt biosynthesis or import by creating isogenic mutants  
118 unable to import Ybt-metal chelates ( $\Delta fyuA$ ) or unable to synthesize Ybt ( $\Delta irp1$ ) in the  
119 AIEC strain NC101 (which also harbors the enterobactin and salmochelin siderophore  
120 systems). We colonized germ-free, inflammation-susceptible  $Il10^{-/-}$  mice with NC101,  
121  $\Delta fyuA$  or  $\Delta irp1$  and compared the severity of colitis induction. At 5 weeks, colitis  
122 histopathology was significantly attenuated in mice colonized with  $\Delta irp1$  compared with  
123 Ybt+ NC101 and  $\Delta fyuA$  (Fig.1A-E), an attenuation that was no longer apparent by 10  
124 weeks (Fig. S1). In contrast, colitis development did not differ in mice colonized with  
125 NC101 versus  $\Delta fyuA$ . Colitis scores differences did not correlate with altered expression  
126 of proinflammatory cytokines known to correlate with disease in this model (Fig. S1)  
127 (13) (16). The reduced colitis potential of  $\Delta irp1$  did not correspond with diminished  
128 luminal growth in the gut (Fig. 1G-I) or *in vitro* growth defects under iron replete or  
129 limiting conditions (Fig. S2). While the  $\Delta fyuA$  mutant exhibited a growth defect at 5  
130 weeks, its attenuated growth was not sustained throughout colitis development and did  
131 not correlate with colitis severity (Fig. 1G-I). Together, these findings demonstrate that  
132 Ybt enhances the proinflammatory potential of AIEC in gnotobiotic, inflammation-  
133 susceptible hosts.

134

135 **Ybt-positive AIEC promote fibrosis development in inflamed  $Il10^{-/-}$  mice.** In a  
136 subset of NC101- and  $\Delta fyuA$ -colonized inflamed  $Il10^{-/-}$  mice, but rarely in  $\Delta irp1$ -  
137 colonized  $Il10^{-/-}$  mice, pathological remodeling of the colonic submucosa was observed  
138 in hematoxylin and eosin (H&E) stained colon sections (Fig. 2, S3). Histological features

139 consistent with fibrosis, including marked expansion of the submucosa with excessive  
140 deposition of lightly eosinophilic, fibrillar substances, characterized the pathology.  
141 Positive staining with Masson's trichrome and Sirius red confirmed the presence of  
142 collagen fibers as part of the expanded ECM in fibrotic mice (Fig. 2B). Lamina propria  
143 collagen localization was also altered in fibrotic mice, exhibiting a basal predilection. In  
144 contrast, in non-fibrotic AIEC-colonized *I110*<sup>-/-</sup> mice, the submucosal ECM was  
145 structured and organized and stained collagen fibrils in the lamina propria exhibited an  
146 apical propensity (Fig. 2A). Taken together, a subset of AIEC-colonized *I110*<sup>-/-</sup> mice  
147 develop histopathological lesions that are consistent with fibrosis.

148         Because fibrosis incidence seemed to differ between NC101-,  $\Delta$ *fyuA*-, and  $\Delta$ *irp1*-  
149 colonized *I110*<sup>-/-</sup> mice, we next utilized a fibrosis pathology scoring system to determine  
150 whether the Ybt system in AIEC impacts inflammation-associated fibrosis (28) (29) (see  
151 Materials and Methods). The most severe fibrosis pathology in all regions of the colon  
152 were observed in  $\Delta$ *fyuA*-colonized *I110*<sup>-/-</sup> mice, which corresponded with higher  
153 incidence of severe disease. In contrast, moderate-severe fibrosis in NC101-colonized  
154 mice was mostly restricted to proximal colon (Fig. 2C-F). These differences in fibrosis  
155 severity and incidence were associated with altered cellular populations infiltrating the  
156 submucosa, with immunologically-defined macrophages (CD206+, CD11b+ and/or  
157 F4/80+ cells) observed in  $\Delta$ *fyuA*-colonized fibrotic mice (Fig. 2G) versus the  
158 inflammatory lymphocytes consistently observed in NC101-colonized, non-fibrotic mice  
159 (20). Inflamed *I110*<sup>-/-</sup> mice colonized with the Ybt-deficient  $\Delta$ *irp1* mutant did not develop  
160 moderate-severe fibrotic lesions and rarely exhibited mild disease (Fig. 2A-D),  
161 suggesting a role for Ybt in inducing and exacerbating this pathology. To validate that

162 the histopathology in our mouse model is consistent with inflammation-associated  
163 fibrosis in human CD, we evaluated H&E and Sirius Red staining of full-thickness colon  
164 resection tissues from fibrotic CD, ulcerative colitis, diverticulitis, and healthy margins of  
165 colorectal cancer resections (Fig. 3, S5). Fibrotic CD tissues exhibited remarkable  
166 similarity to our mouse model, with transmural inflammation, expansion of the  
167 submucosa, thick collagen fibrils, and disruption of the muscularis by collagen and  
168 infiltrating cells (Fig. 3). Fibrosis was not evident by H&E, Sirius Red, or Masson's  
169 Trichrome or at 5 weeks in *Il10<sup>-/-</sup>* mice (data not shown). Collectively, these observations  
170 demonstrate that Ybt+ AIEC promote the development of fibrotic disease in an  
171 experimental model of pathobiont-induced colitis.

172         Because fibrosis occurs in response to tissue injury instigated by inflammation,  
173 we next determined whether fibrosis severity positively correlates with inflammation.  
174 Linear regression analysis revealed a significant negative correlation between fibrosis  
175 and colitis histopathology in the middle colon and no significant correlations in the  
176 proximal and distal colon (Fig. S4). Moreover, NC101- and  $\Delta fyuA$ -colonized mice  
177 exhibited similar levels of colitis histopathology despite the exacerbated fibrosis  
178 observed in  $\Delta fyuA$ -colonized mice (Fig. 1-2). Nonetheless, as previously reported (4),  
179 inflammation is required for the pro-fibrotic activities of NC101 and  $\Delta fyuA$  given that  
180 fibrosis was not observed in uninflamed WT mice colonized with either strain (Fig. S3).  
181 These results demonstrate that while inflammation is required for fibrosis development,  
182 Ybt+ AIEC exacerbate inflammation-associated fibrosis independent of effects on the  
183 proinflammatory potential of AIEC.

184



185 **Fibrosis development corresponds with enhanced subepithelial invasion of *fyuA*-**  
186 **deficient AIEC.** We next determined whether the pro-fibrogenic potential of Ybt+ AIEC  
187 corresponds with altered bacterial localization within the intestines. While colonic mucus  
188 colonization did not differ between the strains, colonic tissue loads of AIEC were  
189 significantly increased in  $\Delta fyuA$ -colonized mice at 10 weeks (Fig. 4A-B). In contrast,  
190 colonic tissue colonization did not differ between NC101 and  $\Delta irp1$ . Colonic mucus or  
191 tissue loads were also comparable at 5 weeks (Fig. S6A-B). Because AIEC are  
192 functionally characterized by epithelial invasiveness, intra-macrophagic survival and  
193 robust biofilm formation, we performed standard *in vitro* assays commonly utilized to  
194 distinguish AIEC strains (9). While iron availability altered AIEC epithelial invasion, no  
195 differences in epithelial adherence or invasion were observed between NC101,  $\Delta irp1$  or  
196  $\Delta fyuA$  under iron replete or limiting conditions (Fig. S6C-D). Similarly, genetic ablation of  
197 Ybt transport did not alter macrophage phagocytosis or intracellular survival of AIEC  
198 (Fig. S6E-G) and had no effect on AIEC biofilm formation (Fig. S6H). Thus, while Ybt  
199 transport or biosynthesis did not impact defining *in vitro* characteristics of AIEC, deletion  
200 of *fyuA* enhanced AIEC colonic tissue colonization, suggesting that FyuA may be  
201 important in modulating bacterial localization within the intestines.

202 To further assess how FyuA impacts AIEC localization in the gut, we employed a  
203 more sensitive approach – *E. coli* 16S fluorescence in situ hybridization (FISH) – to  
204 visualize tissue-associated AIEC. FISH analysis revealed an overall increase in tissue-  
205 associated  $\Delta fyuA$  relative to NC101 and  $\Delta irp1$  (Fig. 4C). This difference was primarily  
206 driven by enhanced subepithelial (lamina propria and submucosa) localization of  $\Delta fyuA$   
207 (Fig. 4D-G). Moreover,  $\Delta fyuA$  was observed within submucosal fibrotic lesions,

208 demonstrating its co-localization with diseased tissue (Fig. 4F, arrowheads). Importantly,  
209 tissue bacteria loads assessed by quantitative bacterial culture and FISH analysis were  
210 positively correlated (Fig. 4H). Together, these results suggest that inactivation of *fyuA*  
211 enhances the subepithelial localization of AIEC, which may contribute to its  
212 profibrogenic potential.

213

#### 214 **Inactivation of Ybt-mediated metal acquisition does not alter AIEC iron sensing.**

215 The canonical function of Ybt is to scavenge extracellular metals for bacterial use (22)  
216 (31). Because the most severe fibrosis occurred in mice colonized with  $\Delta fyuA$ , we first  
217 assessed whether Ybt functionality was altered in this mutant. The extent of Ybt  
218 secretion was comparable between NC101 and  $\Delta fyuA$ , and as expected, Ybt secretion  
219 was not detected in Ybt biosynthesis mutant  $\Delta irp1$  (Fig. S7a). We next confirmed the  
220 functionality of Ybt produced by NC101 and  $\Delta fyuA$ . To accomplish this, we assessed  
221 whether Ybt produced by these strains can restore the growth of siderophore-deficient  
222 *Klebsiella pneumoniae* ( $\Delta entB irp1$ ) cultivated under iron-limiting conditions. In contrast  
223 to  $\Delta irp1$ , both Ybt+ NC101 and  $\Delta fyuA$  rescued *K. pneumoniae*  $\Delta entB irp1$  growth (Fig.  
224 S7b). Taken together, these data suggest altered Ybt functionality does not correspond  
225 with the increased profibrogenic potential of  $\Delta fyuA$ .

226 Mutants lacking FyuA are unable to import Ybt-iron chelates and may therefore  
227 be unable to satisfy their iron requirements. Thus, the enhanced profibrogenic potential  
228 of  $\Delta fyuA$  may be the result of altered bacterial function mediated through disrupted  
229 bacterial iron homeostasis. To test this idea, we first compared *in vivo* expression of  
230 iron-responsive genes in NC101,  $\Delta fyuA$  and  $\Delta irp1$ . Transcript levels of several iron-

231 responsive genes did not differ between strains (Fig. S8A-B), suggesting that NC101  
232 iron homeostasis is not perturbed upon inactivation of Ybt transport or biosynthesis in  
233 the intestines. Similarly, *in vitro* iron depletion with the iron chelator 2'2,bipyridyl (BPD)  
234 did not alter transcription of iron responsive genes (Fig. S8C).

235         To corroborate these results, we performed transcriptional reporter assays  
236 utilizing vectors harboring *gfp* fused to the iron-responsive promoter  $P_{tonB}$ . To first  
237 validate this approach, the NC101 reporter strain was cultivated under iron replete and  
238 limiting conditions, and as expected, iron depletion enhanced *gfp* activity driven by the  
239 *tonB* promoter (Fig. S9a). We next assessed whether NC101,  $\Delta fyuA$  and  $\Delta irp1$  iron-  
240 sensing reporters respond differently to iron depletion. In agreement with our  
241 transcriptional results, *gfp* expression was comparable between NC101 and  $\Delta fyuA$  (Fig.  
242 S9a), suggesting that inactivation of FyuA does not impact AIEC iron sensing. Because  
243 Ybt can also bind other metals including zinc (our own observations) (22) (47) and  
244 copper (our own observations) (23) (24), we performed similar assays with the zinc  
245 responsive promoter  $P_{znuA}$  and the copper responsive promoter  $P_{cusC}$ . As with the iron  
246 sensing reporters, altering zinc and copper availability did not alter sensing of the  
247 respective metals in  $\Delta fyuA$  relative to NC101 (Fig. S9b-c). In contrast, the activities of  
248 iron- and zinc-responsive promoters were significantly increased in  $\Delta irp1$  (Fig. S9a-b),  
249 suggesting that metal starvation is enhanced in this mutant under iron and zinc limiting  
250 conditions. Taken together, these data suggest that while metal sensing in AIEC is not  
251 altered with disruption of Ybt transport, metal homeostasis appears disrupted in Ybt-  
252 negative  $\Delta irp1$ .

253

254 **Deletion of *fyuA* in AIEC promotes the establishment of a pro-fibrotic colonic**  
255 **environment that precedes fibrosis development.** The increased incidence of  
256 fibrosis in  $\Delta fyuA$ -colonized  $I110^{-/-}$  mice may in part be driven by differential host  
257 responses to *fyuA*-expressing versus *fyuA*-deficient AIEC. To test this idea, we utilized  
258 high-throughput RNA sequencing (RNAseq) to determine whether global differences are  
259 apparent in the colonic transcriptomes of inflamed  $I110^{-/-}$  mice and non-inflamed WT  
260 mice colonized with NC101 or  $\Delta fyuA$ . Principal Coordinate Analysis (PCoA) revealed  
261 significant differences in the colonic transcriptomes of NC101-colonized non-fibrotic  
262 versus  $\Delta fyuA$ -colonized fibrotic  $I110^{-/-}$  mice at 10 weeks when fibrosis is apparent (Fig.  
263 5a). This corresponded with 2692 genes and 71 KEGG pathways that were differentially  
264 expressed between  $\Delta fyuA$ - versus NC101-colonized  $I110^{-/-}$  mice (Table S3, S4). In  
265 contrast, the transcriptomes of NC101- versus  $\Delta fyuA$ -colonized WT mice clustered  
266 together (Fig. 5a), suggesting that differences in the host transcriptional responses to  
267 either strain predominantly occur in  $I110^{-/-}$  mice. To determine whether the differing host  
268 responses precede histological evidence of fibrosis, we also compared the colonic  
269 transcriptomes of NC101-colonized versus  $\Delta fyuA$ -colonized  $I110^{-/-}$  mice at 5 weeks.  
270 RNAseq analysis revealed that 169 genes and 116 KEGG pathways were differentially  
271 expressed in NC101-colonized versus  $\Delta fyuA$ -colonized  $I110^{-/-}$  mice (Table S1, S2),  
272 many of which were differentially regulated at both 5 and 10 weeks. However, testing  
273 overall community composition did not reach statistical significance after FDR correction  
274 ( $p < 0.084$ ) (Fig. 5B). Thus, the presence of *fyuA* in AIEC significantly altered host  
275 transcriptional responses in the inflamed colon prior to and throughout the development  
276 of fibrosis.

277 Transcriptomic analysis of a prospectively followed inception cohort of pediatric  
278 CD patients revealed high expression of profibrogenic genes and pathways prior to the  
279 development of stricturing fibrotic disease (30). This included ECM structural  
280 constituents and collagen binding pathways (30). In agreement with these results, the  
281 ECM-receptor interaction KEGG pathway is significantly upregulated in  $\Delta fyuA$ -colonized  
282 mice during (10 weeks) and prior to (5 weeks) histological evidence of fibrosis (Table S2,  
283 S4). We generated a heat map to visualize expression of individual genes in this KEGG  
284 pathway between individual NC101- versus  $\Delta fyuA$ - colonized  $Il10^{-/-}$  mice (Fig. 6A).  
285 Phylogenetic clustering of the 5-week samples demonstrated that three of the  $\Delta fyuA$ -  
286 colonized mice clustered together and exhibited increased expression of numerous  
287 ECM genes, including type I, IV and VI collagens and fibronectin (arrowheads, Fig. 6A).  
288 Careful histological observation by a pathologist blinded to the treatment groups  
289 revealed early evidence of fibrosis in these three  $\Delta fyuA$ - colonized mice, but not in the  
290 remaining  $\Delta fyuA$ -colonized mice that clustered with the NC101-colonized mice and  
291 exhibited lower expression of ECM genes. These unbiased molecular findings are  
292 consistent with our observation that a subset, and not 100%, of  $\Delta fyuA$ -colonized mice  
293 develop fibrosis. These findings were confirmed by targeted quantitative PCR analysis,  
294 where transcript levels of *col1a2* (type 1 collagen) and *fn1* (fibronectin) were  
295 significantly increased in *fyuA*- vs NC101-colonized  $Il10^{-/-}$  mice (Fig. 6B-C). This  
296 corresponded with increased positivity of  $\alpha$ -SMA (smooth muscle actin), a common  
297 feature of fibrosis, in  $\Delta fyuA$ -colonized  $Il10^{-/-}$  mice. Taken together, these findings  
298 demonstrate that ECM components are upregulated in pre-fibrotic  $Il10^{-/-}$  mice colonized  
299 with  $\Delta fyuA$  prior to the development of fibrotic disease.

300 TGF- $\beta$  signaling represents the canonical pro-fibrotic activation pathway.  
301 Therefore, to further confirm the presence of a pro-fibrotic gene signature in fibrotic  
302 mice, we evaluated the expression of genes within the TGF- $\beta$  pathway. RNAseq  
303 analysis detected colonic expression of the three TGF- $\beta$  and TGF- $\beta$  receptor isoforms.  
304 Pre-fibrotic (5 weeks)  $\Delta fyuA$ - versus NC101-colonized  $Il10^{-/-}$  mice trended towards  
305 elevated expression of TGF- $\beta$ 1 and TGF- $\beta$ 3 and TGF- $\beta$  receptor isoforms 1 and 2 (Fig.  
306 S10A). Increased expression of the TGF- $\beta$ 2 receptor was confirmed by quantitative  
307 PCR (Fig. 6D). Similarly, a significant increase in TGF- $\beta$  1-3 and TGF- $\beta$  receptor  
308 isoforms 2 and 3 expression was observed at 10 weeks in fibrotic  $\Delta fyuA$ -colonized  $Il10^{-/-}$   
309 mice (Fig. S10b). Together, these data further support our hypothesis that deletion of  
310 *fyuA* in AIEC promotes a profibrogenic environment in inflammation-susceptible hosts,  
311 which occurs at an early phase of the inflammatory response prior to onset of fibrosis.  
312

313 **Ybt-dependent fibrosis is not associated with altered host systemic iron**  
314 **homeostasis.** Membrane permeable siderophores like Ybt disrupt host iron  
315 homeostasis and modulate iron sensitive host responses, which includes the induction  
316 of *Ndr1* (32) (33). Because deletion of *fyuA* does not alter Ybt secretion, colonization  
317 with  $\Delta fyuA$  may instead increase Ybt internalization by host cells in the absence of  
318 bacterial import and alter host iron homeostasis to promote fibrosis. To address this  
319 possibility, we determined whether colonization with  $\Delta fyuA$  versus NC101 or  $\Delta irp1$  alters  
320 systemic iron homeostasis in  $Il10^{-/-}$  mice. At 2 weeks (prior to histological inflammation  
321 or fibrosis) and at 10 weeks (when colitis and fibrosis are evident in affected animals),  
322 plasma hemoglobin levels did not differ (Fig S11A-B). Similarly, Prussian blue staining

323 did not reveal differences in splenic iron stores at 10 weeks (Fig S11C). To determine  
324 whether local iron homeostasis was altered in the colon, we utilized our RNAseq data to  
325 assess whether established host iron-responsive genes were differentially expressed in  
326 mice colonized with NC101 or  $\Delta fyuA$  (Table S5) (34) (35) (36) (37). Of the 15 canonical  
327 iron-responsive genes investigated, three were differentially regulated in  $I110^{-/-}$  mice  
328 including *Ndrp1* and *Tfrc* (transferrin receptor) and two were differentially regulated in  
329 WT mice including *Tfrc* at 10 weeks. At 5 weeks, *Epas1* was the only iron-responsive  
330 gene that was altered between NC101- versus  $\Delta fyuA$ -colonized  $I110^{-/-}$  mice, a change  
331 not observed at 10 weeks. Together, these findings suggest that  $\Delta fyuA$  does not  
332 profoundly alter systemic or colonic iron homeostasis in the host and may not be a  
333 driving factor for fibrosis induction.

334

### 335 **Yersiniabactin biosynthesis is required for AIEC-mediated fibrosis induction.**

336 Abrogation of Ybt transport in AIEC had opposing effects on fibrosis induction in  $I110^{-/-}$   
337 mice compared to the inactivation of Ybt biosynthesis (Fig. 2). Because fibrosis  
338 development was minimal in  $I110^{-/-}$  mice colonized with the  $\Delta irp1$  mutant, we next  
339 determined whether Ybt biosynthesis is required for the fibrosis-inducing potential of  
340  $\Delta fyuA$ . Genetic inactivation of Ybt biosynthesis in  $\Delta fyuA$  ( $\Delta fyuA irp1$ ) significantly  
341 reduced fibrosis incidence in  $I110^{-/-}$  mice (Fig. 7A-C). Moreover, when comparing fibrosis  
342 incidence in mice colonized with Ybt-positive versus Ybt-negative AIEC, 22 out of 51  
343 mice colonized with Ybt-positive AIEC developed fibrotic disease, whereas 3 out of 26  
344 mice colonized with Ybt-deficient AIEC exhibited histological evidence of fibrosis (Fig.  
345 7B). Inactivation of Ybt production in  $\Delta fyuA$  also reduced its subepithelial invasiveness,

346 resulting in a similar pattern of tissue localization compared to NC101 (Fig. 7D). This  
347 further reinforces the link between increased mucosal invasiveness and the enhanced  
348 profibrogenic potential of  $\Delta fyuA$ . Importantly, colitis severity at 10 weeks was  
349 comparable between  $\Delta fyuA$  and  $\Delta fyuA_{irp1}$  (Fig. S12), suggesting that differences in  
350 inflammation were not driving fibrosis severity.

351 To further demonstrate the profibrogenic potential of  $\Delta fyuA$ , we next determined  
352 whether inactivation of Ybt transport in AIEC enhances the activation of cultured  
353 fibroblasts *in vitro*. Fibroblasts that were cultured with  $\Delta fyuA$  expressed significantly  
354 higher levels of the fibroblast activation marker *Fn1* in comparison to the parental and  
355 Ybt-deficient strains (Fig. 7E). This corresponded with our *in vivo* observations, where  
356 *Fn1* transcripts were elevated in  $\Delta fyuA$ -colonized *Il10<sup>-/-</sup>* mice (Fig. 6C). Together, these  
357 results demonstrate that inactivation of the Ybt siderophore system in AIEC in two  
358 distinct manners (i.e. Ybt transport versus Ybt biosynthesis) does not have similar  
359 effects on colitis induction and fibrosis development in genetically susceptible hosts.  
360 More broadly, in addition to its role in bacterial iron acquisition, our findings collectively  
361 introduce a novel, non-canonical role of Ybt in establishing a profibrogenic  
362 microenvironment in inflammation-susceptible hosts.

363

## 364 **Discussion**

365 Siderophore biosynthetic gene clusters are abundant in the gut microbiota, with  
366 232 putative clusters identified from metagenomes in the Human Microbiome Project  
367 study (38). Given that IBD-associated AIEC strains also harbor many of these  
368 siderophore systems (21), it is conceivable their siderophores may contribute to AIEC-



369 associated intestinal disease. Indeed, here we introduce the siderophore Ybt as a novel  
370 bacterial factor that promotes profibrogenic host responses in the inflamed intestinal  
371 environment. Our findings demonstrate that AIEC are pro-fibrogenic, and inactivation of  
372 Ybt transport in a colitogenic AIEC strain enhances fibrosis development in  
373 inflammation susceptible mice. Inactivation of Ybt biosynthesis in both the Ybt transport  
374 mutant and the parental strain abrogates their fibrosis-inducing potential, suggesting  
375 that Ybt promotes fibrosis development even in the absence of uptake through its  
376 canonical receptor. Profibrogenic transcriptional signatures are evident in the colon prior  
377 to histological presentation of disease, suggesting a causative role for Ybt-mediated  
378 induction of fibrosis. Together, our findings introduce a specific microbiota-derived factor  
379 that promotes the development of inflammation-associated fibrosis.

380         The canonical function of the Ybt siderophore system is to import extracellular  
381 iron sequestered by Ybt through FyuA for bacterial use. Thus, inactivation of FyuA may  
382 enhance the profibrogenic potential of AIEC by perturbing bacterial iron homeostasis  
383 and subsequently modulating bacterial function. However, luminal expression of highly-  
384 sensitive, iron-responsive genes (39) (31) were comparable between the NC101  
385 parental strain, the transport mutant  $\Delta fyuA$  and the Ybt-deficient mutant  $\Delta irp1$ . This  
386 indicates a lack of strain-specific differences in iron sensing. Similarly, while the  
387 functional outcome of iron starvation in bacteria is a fitness disadvantage (40) (31), we  
388 observed no prolonged differences in luminal colonization between NC101,  $\Delta fyuA$  or  
389  $\Delta irp1$  in the non-inflamed intestines or during the course of inflammation and fibrosis  
390 development. This is likely the result of additional iron scavenging systems in NC101  
391 that serve compensatory roles in the Ybt-deficient and transport mutants (41) (21).

392 Indeed, in other Enterobacteriaceae strains, inactivation of multiple iron acquisition  
393 systems is required to attenuate *in vivo* fitness (25) (31). Most importantly, if the  
394 enhanced profibrogenic potential of  $\Delta fyuA$  was the result of dysregulated bacterial iron  
395 homeostasis and consequent effects on Ybt-independent functions, we would expect  
396 fibrosis induction mediated by  $\Delta irp1$  and  $\Delta fyuA$  to be comparable, as both mutants  
397 cannot scavenge iron through Ybt (42). Instead, fibrosis induction was further  
398 attenuated in mice colonized with Ybt-deficient AIEC strains. Collectively, our findings  
399 support a model where Ybt stimulates host profibrogenic responses through a  
400 mechanism independent of its role in importing iron through FyuA.

401 While the Ybt system did not impact overall AIEC intestinal fitness, inactivation of  
402 Ybt transport altered the distribution of AIEC colonization within colonic tissues. This  
403 may contribute to AIEC-driven fibrosis by activating myofibroblasts and mesenchymal  
404 cells either directly via bacterial recognition receptors (i.e. TLRs) or indirectly by  
405 activating intestinal immune cells that modulate profibrogenic cellular responses (5) (6).  
406 In comparison to the parental strain,  $\Delta fyuA$  was more abundant within the colonic  
407 subepithelium and co-localized with fibrotic lesions in  $Il10^{-/-}$  mice at 10 weeks. In  
408 contrast, inactivation of Ybt biosynthesis did not alter tissue localization of AIEC, further  
409 uncoupling the effects of Ybt biosynthesis and Ybt transport on bacterial function.  
410 Instead, inactivation of Ybt biosynthesis in  $\Delta fyuA$  restored tissue colonization patterns  
411 exhibited by the parental strain, suggesting that Ybt mediates the mislocalization of  
412  $\Delta fyuA$  to the subepithelium independent of its role in importing iron through FyuA.  
413 Consistent with our findings, several studies have also reported altered tissue  
414 localization of Enterobacteriaceae pathogens with inactivation of the Ybt system in

415 extraintestinal mucosal environments (43) (26) (44). Finally, it should be noted that  
416 while we observed a statistically significant decrease in fecal colonization of the  $\Delta fyuA$   
417 mutant at 5 weeks, it remains unclear whether a  $<0.5$  log difference in bacterial burdens  
418 in a mono-colonized mouse can impart any meaningful effects on the host – especially  
419 as this decrease was also not observed at 1 or 10 weeks post colonization. Collectively,  
420 these findings highlight one putative non-canonical function of Ybt that may enhance the  
421 profibrogenic potential of AIEC. The precise mechanisms by which inactivation of FyuA  
422 enhances fibrosis development in susceptible hosts will be the subject of future studies.

423         Because Ybt is a secreted bacterial product that permeates mammalian  
424 membranes, Ybt may also promote profibrogenic host responses by perturbing cellular  
425 iron homeostasis in the host. Indeed, the membrane permeable siderophores  
426 enterobactin and yersiniabactin stimulate epithelial proinflammatory responses by  
427 decreasing intracellular iron pools, an effect that is reversed with the addition of iron  
428 (32) (33). Ybt disruption of local iron homeostasis may similarly drive fibrosis  
429 development by stimulating profibrogenic responses in epithelial, mesenchymal and  
430 immune cells. While our host transcriptomics analyses demonstrated similar colonic  
431 expression profiles of numerous iron responsive host genes in NC101- versus  $\Delta fyuA$ -  
432 colonized mice (Table S5), differences in the canonical iron-response genes *Ndrp1* and  
433 *Tfrp* were uniquely observed in *Il10*<sup>-/-</sup> mice. This suggests that local and/or cell-specific  
434 alterations in host iron homeostasis may contribute to the progression of fibrosis.  
435 However, as these changes were observed at 10 weeks but not 5 weeks post-  
436 colonization, the initiation of fibrosis and early pro-fibrotic gene signatures cannot be  
437 attributed to major alterations in host iron homeostasis.

438           In addition to iron, Ybt is capable of binding other metals including nickel, cobalt,  
439 chromium, gallium, and copper (45). This raises the possibility that its profibrogenic  
440 potential is the result of interactions with other metals present in the colonic  
441 environment. For example, when complexed with copper, Ybt acts to limit the lethal  
442 effects of macrophage reactive oxygen species (46). Ybt-copper chelates have been  
443 detected in urine samples from patients infected with uropathogenic *E. coli* (UPEC),  
444 demonstrating that Ybt binds copper *in vivo* (23). Bacterial cells can also import Ybt-  
445 copper chelates through FyuA (47) (24). Together, these findings introduce two putative  
446 mechanisms by which Ybt promotes fibrosis development: 1) through chelation of host  
447 sources of metals other than iron and/or 2) by modulating the transcriptome and  
448 metabolome of AIEC by altering the flux of micronutrients into the bacterial cell. Finally,  
449 because the Ybt enzymatic machinery produces additional secreted metabolites that  
450 remain uncharacterized (48), it is intriguing to speculate that these Ybt precursors and  
451 Ybt-like molecules may also play a role in inflammation-associated fibrosis.

452           Fibrosis complicates many inflammatory intestinal disorders associated with  
453 microbial dysbiosis, however, pro-fibrotic mechanisms remain incompletely understood  
454 and limit therapeutic strategies. This has been hampered by the lack of rodent models  
455 that recapitulate the complex interactions between host genetics and microbial factors  
456 important for inflammation and fibrosis development. Here, we introduce a new model  
457 for inflammation-associated fibrosis driven by a pathobiont-derived small molecule  
458 produced from the Ybt pathogenicity island. Consistent with human CD (30),  
459 profibrogenic pathways are upregulated prior to histological presentation of fibrosis and  
460 mirror the incidence rate of fibrotic disease in our model. Moreover, our model

461 recapitulates key histological and transcriptomic aspects of fibrotic disease in human  
462 CD. More broadly, our findings demonstrate that manipulating the same pathogenicity  
463 island in different ways can result in distinct consequences for disease development.  
464 This highlights an important difference in targeting siderophore biosynthesis versus the  
465 cognate receptors as putative bacterial targets in microbial driven diseases such as CD.  
466 Furthermore, other siderophore and metallophore systems of the gut microbiota may  
467 induce similar responses and contribute to fibrosis. Given the prevalence of AIEC  
468 among the CD population, the presence of the Ybt siderophore system could serve as a  
469 useful prognostic tool in identifying patient subsets susceptible to fibrotic disease.

470

## 471 **Materials and methods**

472 **Bacterial strains.** The fecal isolate *E. coli* NC101 was isolated from WT mice (13). The  
473  $\lambda$ -*red* recombinase system was utilized to generate mutants (49) (Table S7). Bacterial  
474 strains and plasmids are listed in Table S6.

475

476 **Mice.** Germ free *Il10*<sup>-/-</sup> and WT 129S6/SvEV mice were maintained at the National  
477 Gnotobiotic Rodent Resource Center at UNC-CH. Absence of isolator contamination  
478 was confirmed by Gram stain and fecal culture. Eight-12-week old mice were inoculated  
479 via oral and rectal swab with *E. coli* following overnight growth in LB broth (13).  
480 Colonization was confirmed by fecal plating. Five cohorts of *Il10*<sup>-/-</sup> mice were colonized  
481 with NC101 WT or  $\Delta$ *fyuA* and two cohorts of *Il10*<sup>-/-</sup> mice were colonized with  $\Delta$ *irp1* or  
482  $\Delta$ *fyuAirp1*. Animal protocols were approved by the UNC-CH Institutional Animal Care  
483 and Use Committee.

484

485 **Quantification of bacteria.** *E. coli* CFUs in feces were quantified by serial dilutions and  
486 plating on LB plates. Mucus- and tissue-associated bacteria were enumerated as  
487 described (10).

488

489 **Colitis histopathology.** At necropsy, tissues were fixed in 10% neutral buffered  
490 formalin. Colon sections were stained with H&E, Masson's trichrome or Sirius red;  
491 spleens with Prussian blue. Colitis scores (0-12) of Swiss-rolled colons were blindly  
492 assessed as described (13) (20). Composite scores (0-36) are the sum of proximal,  
493 middle and distal colon scores.

494

495 **Fibrosis histopathology.** Fibrosis was blindly assessed on colonic H&E sections and  
496 validated by Sirius red. Severity of fibrosis (0-5) was evaluated using a validated scoring  
497 system (28) (29) evaluating the extent of submucosal involvement: 0 – no fibrosis;  
498 fibrosis in: 1 - <25%, 2 - 26-50%, 3 - 51-75%, or 4 - 76-100% of colon section. One  
499 point was added for lamina propria involvement. Composite scores (0-15) are the sum  
500 of the proximal, middle and distal colon scores. 0 was considered non-fibrotic, 1-3  
501 represented mild fibrosis, and 4+ represented moderate/severe fibrosis. Histopathology  
502 was blindly confirmed by a small animal veterinarian specializing in gastrointestinal  
503 histopathology.

504

505 **Human intestinal samples.** Formalin-fixed, paraffin embedded tissue blocks from  
506 routine diagnostic surgical resections were transferred to UNC-CH under approved

507 Institutional Review Board protocol of the Cleveland Clinic. Sections were H&E and  
508 Sirius red stained from three individuals per disease category: CD, UC, diverticulitis,  
509 and non-inflamed controls (healthy margins of colorectal cancer patients).

510

511 **Fluorescent *in situ* hybridization (FISH).** Colons were washed in PBS to remove  
512 contents and loosely adhered bacteria. Formalin-fixed, paraffin-embedded sections  
513 were mounted on charged glass slides and incubated with an oligonucleotide probe  
514 directed against *E. coli* (Cy3-*E. coli*/*Shigella* probe) and an antisense probe (6-FAM-  
515 non-EUB338) (50). Hybridized samples were washed in PBS, air dried, and mounted  
516 with ProLong antifade (Molecular Probes Inc.). Sections were examined on a BX51  
517 epifluorescence microscope with Olympus DP-7 camera. The FISH analysis was  
518 performed in a blind fashion by two independent investigators as follows: to assess  
519 bacterial colonization, we enumerated individual bacterial cells adhered to epithelial  
520 cells (epithelial attachment), localized within epithelial cells (epithelial invasion), and  
521 translocated across the epithelium (subepithelial invasion). The quantity of bacteria per  
522 colon swiss-roll was converted to a FISH score of 0-4 (Table 1).

523

524 **RNA-seq analysis.** RNA-seq reads were quality filtered at Q20 and trimmed to remove  
525 remaining adaptors using Trimmomatic (51) version 0.35. Resulting reads were aligned  
526 to Illumina iGenome *Mus musculus* GRCm38 reference genome using Tophat (52)  
527 version 2.1.0 utilizing Bowtie2 (53) version 2.2.5. Resulting alignments were processed  
528 using Cufflinks (54) version 2.2.1 along with Illumina iGenome *Mus musculus* GRCm38  
529 Gene transfer format file, after masking rRNA features as described (55). Transcripts

530 were quantified using cuffquant and gene counts were exported to text files and then  
531 imported to edger (56) version 3.12.1 (running inside R version 3.2.3) for detecting  
532 differentially expressed genes. A gene was considered for differential expression test if  
533 present in at least three samples. We considered a gene differentially expressed if its  
534 edgeR FDR adjusted  $p$ -value  $< 0.05$ . Parallel analysis using featureCounts (57) from the  
535 subread package version 1.4.6 for transcript quantification showed similar results.

536

537 Pathway analysis was conducted using GAGE (58) version 2.20.1 using *Mus musculus*  
538 (mmu) Kyoto Encyclopedia of Genes and Genomes (KEGG) (59) pathways and genes  
539 were mapped to KEGG pathways using Pathview version 1.10.1 (60). Pathways were  
540 considered significant if its GAGE  $q$ -value was  $< 0.05$ . ECM-receptor interactions  
541 pathway genes (Figure 6) are based on KEGG pathway mmu04512. We tested the  
542 effect of sequencing run and lane on the clustering of the samples and found both to be  
543 insignificant ( $P$ -value  $> 0.05$ ) for PC1 and PC2 in Figure 5.

544

545 **Statistical analysis.**  $P$ -values were calculated using non-parametric Mann-Whitney  
546 when 2 experimental groups were compared or Kruskal-Wallis with Dunn's post-test  
547 when  $\geq 3$  experimental groups were compared. Data from quantitative bacterial culture  
548 were log transformed for normalization.  $P$ -values  $< 0.05$  were considered significant.

549

550 Additional methods are described in the Supplemental Materials and Methods.

551

552 **Acknowledgements**



553 We acknowledge the Histology and Gnotobiotic Cores at the UNC Center for  
554 Gastrointestinal Biology and Disease (CGIBD: supported by NIH P30DK34987), the  
555 Translational Pathology Laboratory at the UNC Lineberger Comprehensive Cancer  
556 Center (supported by NCI (P30-CA016086-40), NIEHS (P30ES010126-15A1), UCRF,  
557 and NCBT (2015-IDG-1007)) and the National Gnotobiotic Rodent Resource Center  
558 (supported by NIH P40 OD01995). We thank the University of North Carolina's  
559 Department of Chemistry Mass Spectrometry Core Laboratory, especially Brandie  
560 Ehrmann, for their assistance with mass spectrometry analysis, supported by NSF  
561 (CHE-1726291) and the UNC-CH School of Medicine Office of Research. We also  
562 acknowledge Taylor Tibbs and Lacey Lopez for assistance with histological stains, and  
563 Elise Sloey for assistance with GFP reporter assays. This work was supported by the  
564 following grants: NIH/NIDDK K01 DK103952 (JCA), Kenneth Rainin Foundation  
565 Innovator Award (JCA), Pilot feasibility grant from the CGIBD to JCA (NIH  
566 P30DK34987), American Gastroenterological Association Augustyn Award in Digestive  
567 Cancer (JCA), Lineberger Comprehensive Cancer Center Pilot Grant and UCRF (JCA),  
568 North Carolina Translational and Clinical Sciences Institute (NC TraCS) pilot grant  
569 (JCA), American Cancer Society postdoctoral fellowship (JCA), UNC dissertation  
570 completion fellowship (ME), Microbiome Initiative (RBS and KWS) and Gnotobiotic  
571 Facility (RBS) grants from the Crohn's and Colitis Foundation of America (CCFA), a  
572 Student Research Fellowship Award from the CCFA (LNM), and pilot grant  
573 P30DK097948 and K08DK110415 (FR).

574

575 **Author contributions**

576 Conceptualization, M.E., K.S., R.B.S. and J.C.A.; Methodology, M.E. and J.C.A.;

577 Software, R.Z.G.; Validation, A.R.; Formal Analysis, M.E., R.Z.G., B.D. and J.C.A.;

578 Investigation, M.E., L.F., B.D., L.N.M, C.A.B, L.R.L., A.M.R., C.B., J.W.H, I.O.G., and

579 J.C.A.; Resources, C.B., K.S., C.J., I.O.G., F.R., R.B.S. and J.C.A.; Data Curation,

580 R.Z.G.; Writing – Original Draft, M.E. and J.C.A.; Writing – Review and Editing, M.E.,

581 J.C.A and R.B.S.; Visualization, M.E.; Supervision, J.C.A.; Funding Acquisition, J.C.A.

582 and R.B.S.

583

## 584 **References**

- 585 1. **Sartor RB, Wu GD.** 2017. Roles for Intestinal Bacteria, Viruses, and Fungi in  
586 Pathogenesis of Inflammatory Bowel Diseases and Therapeutic Approaches.  
587 *Gastroenterology* **152**:327–339.e4.
- 588 2. **Peyrin-Biroulet L, Loftus EV, Colombel JF, Sandborn WJ.** 2010. The natural  
589 history of adult Crohn's disease in population-based cohorts. *Am J*  
590 *Gastroenterology* **105**:289–297.
- 591 3. **Latella G, Rieder F.** 2017. Intestinal fibrosis: ready to be reversed. *Curr Opin*  
592 *Gastroenterol* **33**:239–245.
- 593 4. **Rieder F, Fiocchi C, Rogler G.** 2017. Mechanisms, Management, and Treatment  
594 of Fibrosis in Patients With Inflammatory Bowel Diseases. *Gastroenterology*  
595 **152**:340–350.e6.
- 596 5. **van Tol EA, Holt L, Li FL, Kong FM, Rippe R, Yamauchi M, Pucilowska J,**  
597 **Lund PK, Sartor RB.** 1999. Bacterial cell wall polymers promote intestinal fibrosis  
598 by direct stimulation of myofibroblasts. *Am J Physiol* **277**:G245–55.
- 599 6. **Otte J-M, Rosenberg IM, Podolsky DK.** 2003. Intestinal myofibroblasts in innate  
600 immune responses of the intestine. *Gastroenterology* **124**:1866–1878.
- 601 7. **Grassl GA, Valdez Y, Bergstrom KSB, Vallance BA, Finlay BB.** 2008. Chronic  
602 enteric salmonella infection in mice leads to severe and persistent intestinal  
603 fibrosis. *Gastroenterology* **134**:768–780.
- 604 8. **Small C-LN, Reid-Yu SA, McPhee JB, Coombes BK.** 2013. Persistent infection  
605 with Crohn's disease-associated adherent-invasive *Escherichia coli* leads to  
606 chronic inflammation and intestinal fibrosis. *Nature Communications* **4**:1957.

- 607 9. **Darfeuille-Michaud A, Boudeau J, Bulois P, Neut C, Glasser A-L, Barnich N,**  
608 **Bringer M-A, Swidsinski A, Beaugerie L, Colombel J-F.** 2004. High prevalence  
609 of adherent-invasive *Escherichia coli* associated with ileal mucosa in Crohn's  
610 disease. *Gastroenterology* **127**:412–421.
- 611 10. **Martin HM, Campbell BJ, Hart CA, Mpfu C, Nayar M, Singh R, Englyst H,**  
612 **Williams HF, Rhodes JM.** 2004. Enhanced *Escherichia coli* adherence and  
613 invasion in Crohn's disease and colon cancer. *Gastroenterology* **127**:80–93.
- 614 11. **Baumgart M, Dogan B, Rishniw M, Weitzman G, Bosworth B, Yantiss R, Orsi**  
615 **RH, Wiedmann M, Mcdonough P, Kim SG, Berg D, Schukken Y, Scherl E,**  
616 **Simpson KW.** 2007. Culture independent analysis of ileal mucosa reveals a  
617 selective increase in invasive *Escherichia coli* of novel phylogeny relative to  
618 depletion of Clostridiales in Crohn's disease involving the ileum. *ISME J* **1**:403–  
619 418.
- 620 12. **Boudeau J, Glasser AL, Masseret E, Joly B, Darfeuille-Michaud A.** 1999.  
621 Invasive ability of an *Escherichia coli* strain isolated from the ileal mucosa of a  
622 patient with Crohn's disease. *Infect Immun* **67**:4499–4509.
- 623 13. **Kim SC, Tonkonogy SL, Albright CA, Tsang J, Balish EJ, Braun J, Huycke**  
624 **MM, Sartor RB.** 2005. Variable phenotypes of enterocolitis in interleukin 10-  
625 deficient mice monoassociated with two different commensal bacteria.  
626 *Gastroenterology* **128**:891–906.
- 627 14. **Carvalho FA, Koren O, Goodrich JK, Johansson MEV, Nalbantoglu I, Aitken**  
628 **JD, Su Y, Chassaing B, Walters WA, González A, Clemente JC, Cullender TC,**  
629 **Barnich N, Darfeuille-Michaud A, Vijay-Kumar M, Knight R, Ley RE, Gewirtz**  
630 **AT.** 2012. Transient inability to manage proteobacteria promotes chronic gut  
631 inflammation in TLR5-deficient mice. *Cell Host Microbe* **12**:139–152.
- 632 15. **Martinez-Medina M, Denizot J, Dreux N, Robin F, Billard E, Bonnet R,**  
633 **Darfeuille-Michaud A, Barnich N.** 2014. Western diet induces dysbiosis with  
634 increased *E coli* in CEABAC10 mice, alters host barrier function favouring AIEC  
635 colonisation. *Gut* **63**:116–124.
- 636 16. **Kim SC, Tonkonogy SL, Karrasch T, Jobin C, Sartor RB.** 2007. Dual-  
637 association of gnotobiotic IL-10<sup>-/-</sup> mice with 2 nonpathogenic commensal bacteria  
638 induces aggressive pancolitis. *Inflamm Bowel Dis* **13**:1457–1466.
- 639 17. **Patwa LG, Fan T-J, Tchaptchet S, Liu Y, Lussier YA, Sartor RB, Hansen JJ.**  
640 2011. Chronic intestinal inflammation induces stress-response genes in  
641 commensal *Escherichia coli*. *Gastroenterology* **141**:1842–51.e1–10.
- 642 18. **Tchaptchet S, Fan T-J, Goeser L, Schoenborn A, Gulati AS, Sartor RB,**  
643 **Hansen JJ.** 2013. Inflammation-induced acid tolerance genes *gadAB* in luminal  
644 commensal *Escherichia coli* attenuate experimental colitis. *Infect Immun*  
645 **81**:3662–3671.

- 646 19. **Ellermann M, Huh EY, Liu B, Carroll IM, Tamayo R, Sartor RB.** 2015.  
647 Adherent-Invasive Escherichia coli Production of Cellulose Influences Iron-  
648 Induced Bacterial Aggregation, Phagocytosis, and Induction of Colitis. *Infect*  
649 *Immun* **83**:4068–4080.
- 650 20. **Arthur JC, Perez-Chanona E, Mühlbauer M, Tomkovich S, Uronis JM, Fan T-  
651 J, Campbell BJ, Abujamel T, Dogan B, Rogers AB, Rhodes JM, Stintzi A,  
652 Simpson KW, Hansen JJ, Keku TO, Fodor AA, Jobin C.** 2012. Intestinal  
653 inflammation targets cancer-inducing activity of the microbiota. *Science* **338**:120–  
654 123.
- 655 21. **Dogan B, Suzuki H, Herlekar D, Sartor RB, Campbell BJ, Roberts CL,  
656 Stewart K, Scherl EJ, Araz Y, Bitar PP, Lefébure T, Chandler B, Schukken  
657 YH, Stanhope MJ, Simpson KW.** 2014. Inflammation-associated adherent-  
658 invasive Escherichia coli are enriched in pathways for use of propanediol and iron  
659 and M-cell translocation. *Inflamm Bowel Dis* **20**:1919–1932.
- 660 22. **Perry RD, Fetherston JD.** 2011. Yersiniabactin iron uptake: mechanisms and  
661 role in *Yersinia pestis* pathogenesis. *Microbes Infect* **13**:808–817.
- 662 23. **Chaturvedi KS, Hung CS, Crowley JR, Stapleton AE, Henderson JP.** 2012.  
663 The siderophore yersiniabactin binds copper to protect pathogens during infection.  
664 *Nat Chem Biol* **8**:731–736.
- 665 24. **Koh EI, Robinson AE, Bandara N, Rogers BE, Henderson JP.** 2017. Copper  
666 import in *Escherichia coli* by the yersiniabactin metallophore system. *Nat Chem*  
667 *Biol* **13**:1016–1021.
- 668 25. **Bachman MA, Oyler JE, Burns SH, Caza M, Lépine F, Dozois CM, Weiser JN.**  
669 2011. *Klebsiella pneumoniae* yersiniabactin promotes respiratory tract infection  
670 through evasion of lipocalin 2. *Infect Immun* **79**:3309–3316.
- 671 26. **Garcia EC, Brumbaugh AR, Mobley HLT.** 2011. Redundancy and specificity of  
672 *Escherichia coli* iron acquisition systems during urinary tract infection. *Infect*  
673 *Immun* **79**:1225–1235.
- 674 27. **Rakin A, Schneider L, Podladchikova O.** 2012. Hunger for iron: the alternative  
675 siderophore iron scavenging systems in highly virulent *Yersinia*. *Front Cell Infect*  
676 *Microbiol* **2**:151.
- 677 28. **Rigby RJ, Hunt MR, Scull BP, Simmons JG, Speck KE, Helmrath MA, Lund  
678 PK.** 2009. A new animal model of postsurgical bowel inflammation and fibrosis:  
679 the effect of commensal microflora. *Gut* **58**:1104–1112.
- 680 29. **Gordon IO, Agrawal N, Willis E, Goldblum JR, Lopez R, Allende D, Liu X,  
681 Patil DY, Yerian L, El-Khider F, Fiocchi C, Rieder F.** 2018. Fibrosis in ulcerative  
682 colitis is directly linked to severity and chronicity of mucosal inflammation. *Aliment*  
683 *Pharmacol Ther* **47**:922–939.

- 684 30. **Kugathasan S, Denson LA, Walters TD, Kim M-O, Marigorta UM, Schirmer M,**  
685 **Mondal K, Liu C, Griffiths A, Noe JD, Crandall WV, Snapper S, Rabizadeh S,**  
686 **Rosh JR, Shapiro JM, Guthery S, Mack DR, Kellermayer R, Kappelman MD,**  
687 **Steiner S, Moulton DE, Keljo D, Cohen S, Oliva-Hemker M, Heyman MB,**  
688 **Otley AR, Baker SS, Evans JS, Kirschner BS, Patel AS, Ziring D, Trapnell BC,**  
689 **Sylvester FA, Stephens MC, Baldassano RN, Markowitz JF, Cho J, Xavier RJ,**  
690 **Huttenhower C, Aronow BJ, Gibson G, Hyams JS, Dubinsky M-C.** 2017.  
691 Prediction of complicated disease course for children newly diagnosed with  
692 Crohn's disease: a multicentre inception cohort study. *Lancet* **389**:1710–1718.
- 693 31. **Deriu E, Liu JZ, Pezeshki M, Edwards RA, Ochoa RJ, Contreras H, Libby SJ,**  
694 **Fang FC, Raffatellu M.** 2013. Probiotic bacteria reduce salmonella typhimurium  
695 intestinal colonization by competing for iron. *Cell Host Microbe* **14**:26–37.
- 696 32. **Nelson AL, Ratner AJ, Barasch J, Weiser JN.** 2007. Interleukin-8 secretion in  
697 response to aferric enterobactin is potentiated by siderocalin. *Infect Immun*  
698 **75**:3160–3168.
- 699 33. **Holden VI, Lenio S, Kuick R, Ramakrishnan SK, Shah YM, Bachman MA.**  
700 2014. Bacterial siderophores that evade or overwhelm lipocalin 2 induce hypoxia  
701 inducible factor 1 $\alpha$  and proinflammatory cytokine secretion in cultured respiratory  
702 epithelial cells. *Infect Immun* **82**:3826–3836.
- 703 34. **Sanchez M, Galy B, Dandekar T, Bengert P, Vainshtein Y, Stolte J,**  
704 **Muckenthaler MU, Hentze MW.** 2006. Iron regulation and the cell cycle:  
705 identification of an iron-responsive element in the 3'-untranslated region of human  
706 cell division cycle 14A mRNA by a refined microarray-based screening strategy. *J*  
707 *Biol Chem* **281**:22865–22874.
- 708 35. **Sanchez M, Galy B, Schwanhaeuser B, Blake J, Bahr-Ivacevic T, Benes V,**  
709 **Selbach M, Muckenthaler MU, Hentze MW.** 2011. Iron regulatory protein-1 and -  
710 2: transcriptome-wide definition of binding mRNAs and shaping of the cellular  
711 proteome by iron regulatory proteins. *Blood* **118**:e168–e179.
- 712 36. **Anderson CP, Shen M, Eisenstein RS, Leibold EA.** 2012. Mammalian iron  
713 metabolism and its control by iron regulatory proteins. *Biochimica et Biophysica*  
714 *Acta (BBA) - Molecular Cell Research* **1823**:1468–1483.
- 715 37. **Holden VI, Bachman MA.** 2015. Diverging roles of bacterial siderophores during  
716 infection. *Metallomics* **7**:986–995.
- 717 38. **Donia MS, Cimermancic P, Schulze CJ, Wieland Brown LC, Martin J, Mitreva**  
718 **M, Clardy J, Linington RG, Fischbach MA.** 2014. A systematic analysis of  
719 biosynthetic gene clusters in the human microbiome reveals a common family of  
720 antibiotics. *Cell* **158**:1402–1414.
- 721 39. **McHugh JP, Rodríguez-Quinoñes F, Abdul-Tehrani H, Svistunenko DA,**  
722 **Poole RK, Cooper CE, Andrews SC.** 2003. Global iron-dependent gene

- 723 regulation in *Escherichia coli*. A new mechanism for iron homeostasis. *J Biol*  
724 *Chem* **278**:29478–29486.
- 725 40. **Stojilkovic I, Cobeljic M, Hantke K.** 1993. *Escherichia coli* K-12 ferrous iron  
726 uptake mutants are impaired in their ability to colonize the mouse intestine. *FEMS*  
727 *Microbiol Lett* **108**:111–115.
- 728 41. **Arthur JC, Gharaibeh RZ, Mühlbauer M, Perez-Chanona E, Uronis JM,**  
729 **McCafferty J, Fodor AA, Jobin C.** 2014. Microbial genomic analysis reveals the  
730 essential role of inflammation in bacteria-induced colorectal cancer. *Nature*  
731 *Communications* **5**:4724.
- 732 42. **Bearden SW, Fetherston JD, Perry RD.** 1997. Genetic organization of the  
733 yersiniabactin biosynthetic region and construction of avirulent mutants in *Yersinia*  
734 *pestis*. *Infect Immun* **65**:1659–1668.
- 735 43. **Bachman MA, Lenio S, Schmidt L, Oyler JE, Weiser JN.** 2012. Interaction of  
736 lipocalin 2, transferrin, and siderophores determines the replicative niche of  
737 *Klebsiella pneumoniae* during pneumonia. *mBio* **3**.
- 738 44. **Brumbaugh AR, Smith SN, Subashchandrabose S, Himpsl SD, Hazen TH,**  
739 **Rasko DA, Mobley HLT.** 2015. Blocking Yersiniabactin Import Attenuates  
740 Extraintestinal Pathogenic *Escherichia coli* in Cystitis and Pyelonephritis and  
741 Represents a Novel Target To Prevent Urinary Tract Infection. *Infect Immun*  
742 **83**:1443–1450.
- 743 45. **Koh E-I, Hung CS, Parker KS, Crowley JR, Giblin DE, Henderson JP.** 2015.  
744 Metal selectivity by the virulence-associated yersiniabactin metallophore system.  
745 *Metallomics* **7**:1011–1022.
- 746 46. **Chaturvedi KS, Hung CS, Giblin DE, Urushidani S, Austin AM, Dinauer MC,**  
747 **Henderson JP.** 2014. Cupric yersiniabactin is a virulence-associated superoxide  
748 dismutase mimic. *ACS Chem Biol* **9**:551–561.
- 749 47. **Bobrov AG, Kirillina O, Fetherston JD, Miller MC, Burlison JA, Perry RD.**  
750 2014. The *Yersinia pestis* siderophore, yersiniabactin, and the ZnuABC system  
751 both contribute to zinc acquisition and the development of lethal septicaemic  
752 plague in mice. *Mol Microbiol* **93**:759–775.
- 753 48. **Ohlemacher SI, Giblin DE, d'Avignon DA, Stapleton AE, Trautner BW,**  
754 **Henderson JP.** 2017. Enterobacteria secrete an inhibitor of *Pseudomonas*  
755 virulence during clinical bacteriuria. *J Clin Invest* **127**:4018–4030.
- 756 49. **Datsenko KA, Wanner BL.** 2000. One-step inactivation of chromosomal genes in  
757 *Escherichia coli* K-12 using PCR products. *Proc Natl Acad Sci USA* **97**:6640–  
758 6645.
- 759 50. **Simpson KW, Dogan B, Rishniw M, Goldstein RE, Klaessig S, McDonough**

- 760 **PL, German AJ, Yates RM, Russell DG, Johnson SE, Berg DE, Harel J,**  
761 **Bruant G, McDonough SP, Schukken YH.** 2006. Adherent and invasive  
762 *Escherichia coli* is associated with granulomatous colitis in boxer dogs. *Infect*  
763 *Immun* **74**:4778–4792.
- 764 51. **Bolger AM, Lohse M, Usadel B.** 2014. Trimmomatic: a flexible trimmer for  
765 Illumina sequence data. *Bioinformatics* **30**:2114–2120.
- 766 52. **Kim D, Perteza G, Trapnell C, Pimentel H, Kelley R, Salzberg SL.** 2013.  
767 TopHat2: accurate alignment of transcriptomes in the presence of insertions,  
768 deletions and gene fusions. *Genome Biology* **14**:R36.
- 769 53. **Langmead B, Salzberg SL.** 2012. Fast gapped-read alignment with Bowtie 2.  
770 *Nat Meth* **9**:357–359.
- 771 54. **Trapnell C, Roberts A, Goff L, Perteza G, Kim D, Kelley DR, Pimentel H,**  
772 **Salzberg SL, Rinn JL, Pachter L.** 2012. Differential gene and transcript  
773 expression analysis of RNA-seq experiments with TopHat and Cufflinks. *Nat*  
774 *Protoc* **7**:562–578.
- 775 55. **Gilad Y, Mizrahi-Man O.** 2015. A reanalysis of mouse ENCODE comparative  
776 gene expression data. *F1000Res* **4**:121.
- 777 56. **Robinson MD, McCarthy DJ, Smyth GK.** 2010. edgeR: a Bioconductor package  
778 for differential expression analysis of digital gene expression data. *Bioinformatics*  
779 **26**:139–140.
- 780 57. **Liao Y, Smyth GK, Shi W.** 2014. featureCounts: an efficient general purpose  
781 program for assigning sequence reads to genomic features. *Bioinformatics*  
782 **30**:923–930.
- 783 58. **Luo W, Friedman MS, Shedden K, Hankenson KD, Woolf PJ.** 2009. GAGE:  
784 generally applicable gene set enrichment for pathway analysis. *BMC*  
785 *Bioinformatics* **10**:161.
- 786 59. **Kanehisa M, Goto S.** 2000. KEGG: kyoto encyclopedia of genes and genomes.  
787 *Nucleic Acids Res* **28**:27–30.
- 788 60. **Luo W, Brouwer C.** 2013. Pathview: an R/Bioconductor package for pathway-  
789 based data integration and visualization. *Bioinformatics* **29**:1830–1831.
- 790
- 791
- 792
- 793

794 **Figure Legends**

795 **Figure 1. Yersiniabactin enhances the proinflammatory potential of AIEC in**  
796 **gnotobiotic *Il10*<sup>-/-</sup> mice.** Germ free *Il10*<sup>-/-</sup> mice were mono-associated with the AIEC  
797 strain *E. coli* NC101 (NC),  $\Delta$ *fyuA* or  $\Delta$ *irp1* for 5 weeks. A) Composite and B-D) regional  
798 histopathology colitis scores. E) Representative H&E histology of the colon. Scale bar,  
799 50  $\mu$ m. F) Composite histopathology colitis scores of *Il10*<sup>-/-</sup> mice colonized with  
800 yersiniabactin-(Ybt)-positive or Ybt-deficient NC101. Lines are at the median. *P*-values  
801 were determined by Kruskal-Wallis or Mann-Whitney. G-I) Quantitative bacteria culture  
802 from feces at G) 1 week, H) 5 weeks or I) 10 weeks post-colonization. Lines are at the  
803 mean. *P*-values were determined by one-way ANOVA. Each symbol represents an  
804 individual mouse (*n* = 8-14). \* *p* < 0.05, \*\* *p* < 0.01, \*\*\* *p* < 0.001.

805

806 **Figure 2. Ybt+ AIEC promotes fibrosis development in colitic *Il10*<sup>-/-</sup> mice.** Germ free  
807 *Il10*<sup>-/-</sup> mice were mono-associated with the Ybt+ AIEC strains NC or  $\Delta$ *fyuA* or the Ybt-  
808 strain  $\Delta$ *irp1* for 10 weeks. A-B) Representative colonic histology of gnotobiotic *Il10*<sup>-/-</sup>  
809 mice colonized with A) NC or B)  $\Delta$ *fyuA*. Colon sections were stained with H&E, Sirius  
810 red/fast green or Masson's trichrome. Regions of Sirius red binding is indicated by white  
811 arrowheads in the submucosa and red arrowheads in the lamina propria. C) Composite  
812 and D-F) regional fibrosis histology scores. Each symbol represents an individual  
813 mouse (*n* = 11-29). Lines are at the median. *P*-values were determined by Kruskal-  
814 Wallis. \* *p* < 0.05. G) Representative colonic histology from gnotobiotic *Il10*<sup>-/-</sup> mice  
815 colonized with  $\Delta$ *fyuA* for 5 weeks. Colonic sections were stained with antibodies against  
816 the established macrophage cell surface markers CD206, CD11b, and F4/80 and were



817 counterstained with the DNA stain DAPI. Scale bar, 200  $\mu\text{m}$ . SM, submucosa. LP,  
818 lamina propria. L, lumen.

819

820 **Figure 3. Fibrosis development in AIEC-colonized *II10*<sup>-/-</sup> mice recapitulates**  
821 **histopathological features of fibrosis in human Crohn's disease.** Representative  
822 colonic histology of A)  $\Delta$ *fyuA*-colonized fibrotic *II10*<sup>-/-</sup> mice. B-C) Representative  
823 histology of full thickness colon cross-sections from fibrotic Crohn's disease patients,  
824 representative of  $n = 3$  per group. C) Magnification of the muscularis serosa. Colon  
825 sections were stained with H&E or Sirius red. Regions of Sirius red binding are  
826 indicated with white arrowheads. LP, lamina propria. SM, submucosa. F, fibrotic lesion.  
827 Scale bar, 100  $\mu\text{m}$ .

828

829 **Figure 4. Inactivation of yersiniabactin transport enhances AIEC mucosal**  
830 **invasion.** Germ free *II10*<sup>-/-</sup> mice were mono-associated with NC,  $\Delta$ *fyuA* or  $\Delta$ *irp1* for 10  
831 weeks. Quantitative bacterial culture of A) colonic mucus or B) colonic tissues. Each  
832 symbol represents an individual mouse ( $n = 11-15$ ). Lines are at the median. *P*-values  
833 were determined by Kruskal-Wallis. C) FISH analysis of proximal colons ( $n = 4-8$ ). *P*-  
834 values were determined by Kruskal-Wallis. D-F) Representative FISH images of the  
835 proximal colon. Red, *E. coli*. Blue, DAPI. Arrowheads in F) indicate *E. coli* localized  
836 within the lamina propria (white) and submucosa (yellow). E, epithelium. LP, lamina  
837 propria. SM, submucosa. Scale bar, 200  $\mu\text{m}$ . G) Subepithelial AIEC invasion scores as  
838 assessed by FISH in C. Red squares (indicated by the grey triangles) represent fibrotic  
839 mice as assessed by histopathology. Lines are at the median. *P*-values were

840 determined by Kruskal-Wallis. H) Linear regression analysis of quantitative bacterial  
841 culture versus FISH score from colonic tissues. Red squares represent fibrotic mice as  
842 assessed by histopathology. \*  $p < 0.05$ , \*\*  $p < 0.01$ .

843

844 **Figure 5. Deletion of *fyuA* in AIEC promotes transcriptome-wide changes in the**  
845 **colons of *Il10*<sup>-/-</sup> mice.** Principal component analysis of transcriptome-wide changes in  
846 the colons of A) NC- vs  $\Delta fyuA$ -colonized WT or *Il10*<sup>-/-</sup> mice after 10 weeks, B) NC- vs  
847  $\Delta fyuA$ -colonized *Il10*<sup>-/-</sup> mice after 5 weeks or C) NC- vs  $\Delta fyuA$ -colonized *Il10*<sup>-/-</sup> mice after  
848 5 or 10 weeks.

849

850 **Figure 6. Deletion of *fyuA* in AIEC promotes pro-fibrotic host responses**  
851 **preceding fibrosis development.** A) Heat map of log2 normalized counts of genes in  
852 the ECM-receptor interaction KEGG pathway in NC- or  $\Delta fyuA$ -colonized *Il10*<sup>-/-</sup> mice at 5  
853 weeks. B-D) Relative colonic transcript levels of B) *Col1a1*, C) *Fn1* and D) *Tgfbr2* in  
854 *Il10*<sup>-/-</sup> mice mono-associated with NC or  $\Delta fyuA$  for 5 weeks. Each symbol represents an  
855 individual mouse ( $n = 10-13$ ). Lines are at the median. *P*-values were determined by  
856 Mann-Whitney. \*  $p < 0.05$ , \*\*  $p < 0.01$ . F-G) Proximal colons from *Il10*<sup>-/-</sup> mice colonized  
857 with F) NC or G)  $\Delta fyuA$  for 10 weeks were stained with  $\alpha$ -SMA (red), CD31 (green), or  
858 DAPI. LP, lamina propria. SM, submucosa. MS, muscularis serosa. Scale bar, 50  $\mu\text{m}$ .

859

860 **Figure 7. Yersiniabactin biosynthesis promotes fibrosis in AIEC-driven colitis.**  
861 Germ free *Il10*<sup>-/-</sup> mice were mono-associated with the AIEC strain NC,  $\Delta fyuA$ ,  $\Delta irp1$  or  
862  $\Delta fyuA irp1$  for 10 weeks. A) Composite fibrosis histology scores. Each symbol

863 represents an individual mouse ( $n = 10-29$ ). Lines are at the median.  $P$ -values were  
864 determined by Kruskal-Wallis. B) Composite histopathology colitis scores of  $I110^{-/-}$  mice  
865 colonized with ybt-positive or ybt-deficient AIEC. Lines are at the median.  $P$ -values were  
866 determined by Mann-Whitney. C) Fibrosis incidence rates of  $I110^{-/-}$  mice colonized with  
867 Ybt-positive or Ybt-deficient AIEC as assessed by H&E histology.  $P$ -values were  
868 determined by Fisher's exact test. D) FISH analysis of proximal colons ( $n = 4-8$ ).  $P$ -  
869 values were determined by one-way ANOVA. E) Swiss 3T3 fibroblasts were co-cultured  
870 with NC,  $\Delta irp1$ ,  $\Delta fyuA$ ,  $\Delta fyuA+fyuA$  or  $\Delta fyuA irp1$ . Fibroblasts stimulated with TGF- $\beta$   
871 served as a positive control (pos). Data are represented as the mean  $\pm$  SEM.  $P$ -values  
872 were determined by Kruskal-Wallis. F) Working model. Data for NC-,  $\Delta fyuA$ -, and  $\Delta irp1$ -  
873 colonized mice are also presented in Figures 2 and 4. \*  $p < 0.05$ , \*\*  $p < 0.01$ , \*\*\*  $p <$   
874 0.001.

875

876 **Table 1: FISH Scoring**

| <b>FISH SCORE</b> | <b>Epithelial attachment</b> | <b>Epithelial invasion</b> | <b>Subepithelial invasion</b> |
|-------------------|------------------------------|----------------------------|-------------------------------|
| <b>0</b>          | None                         | None                       | None                          |
| <b>1</b>          | 1-50                         | 1-10                       | 1-5                           |
| <b>2</b>          | 51-150                       | 11-20                      | 6-10                          |
| <b>3</b>          | 151-250                      | 21-30                      | 11-15                         |
| <b>4</b>          | 251+                         | 31+                        | 16+                           |

877

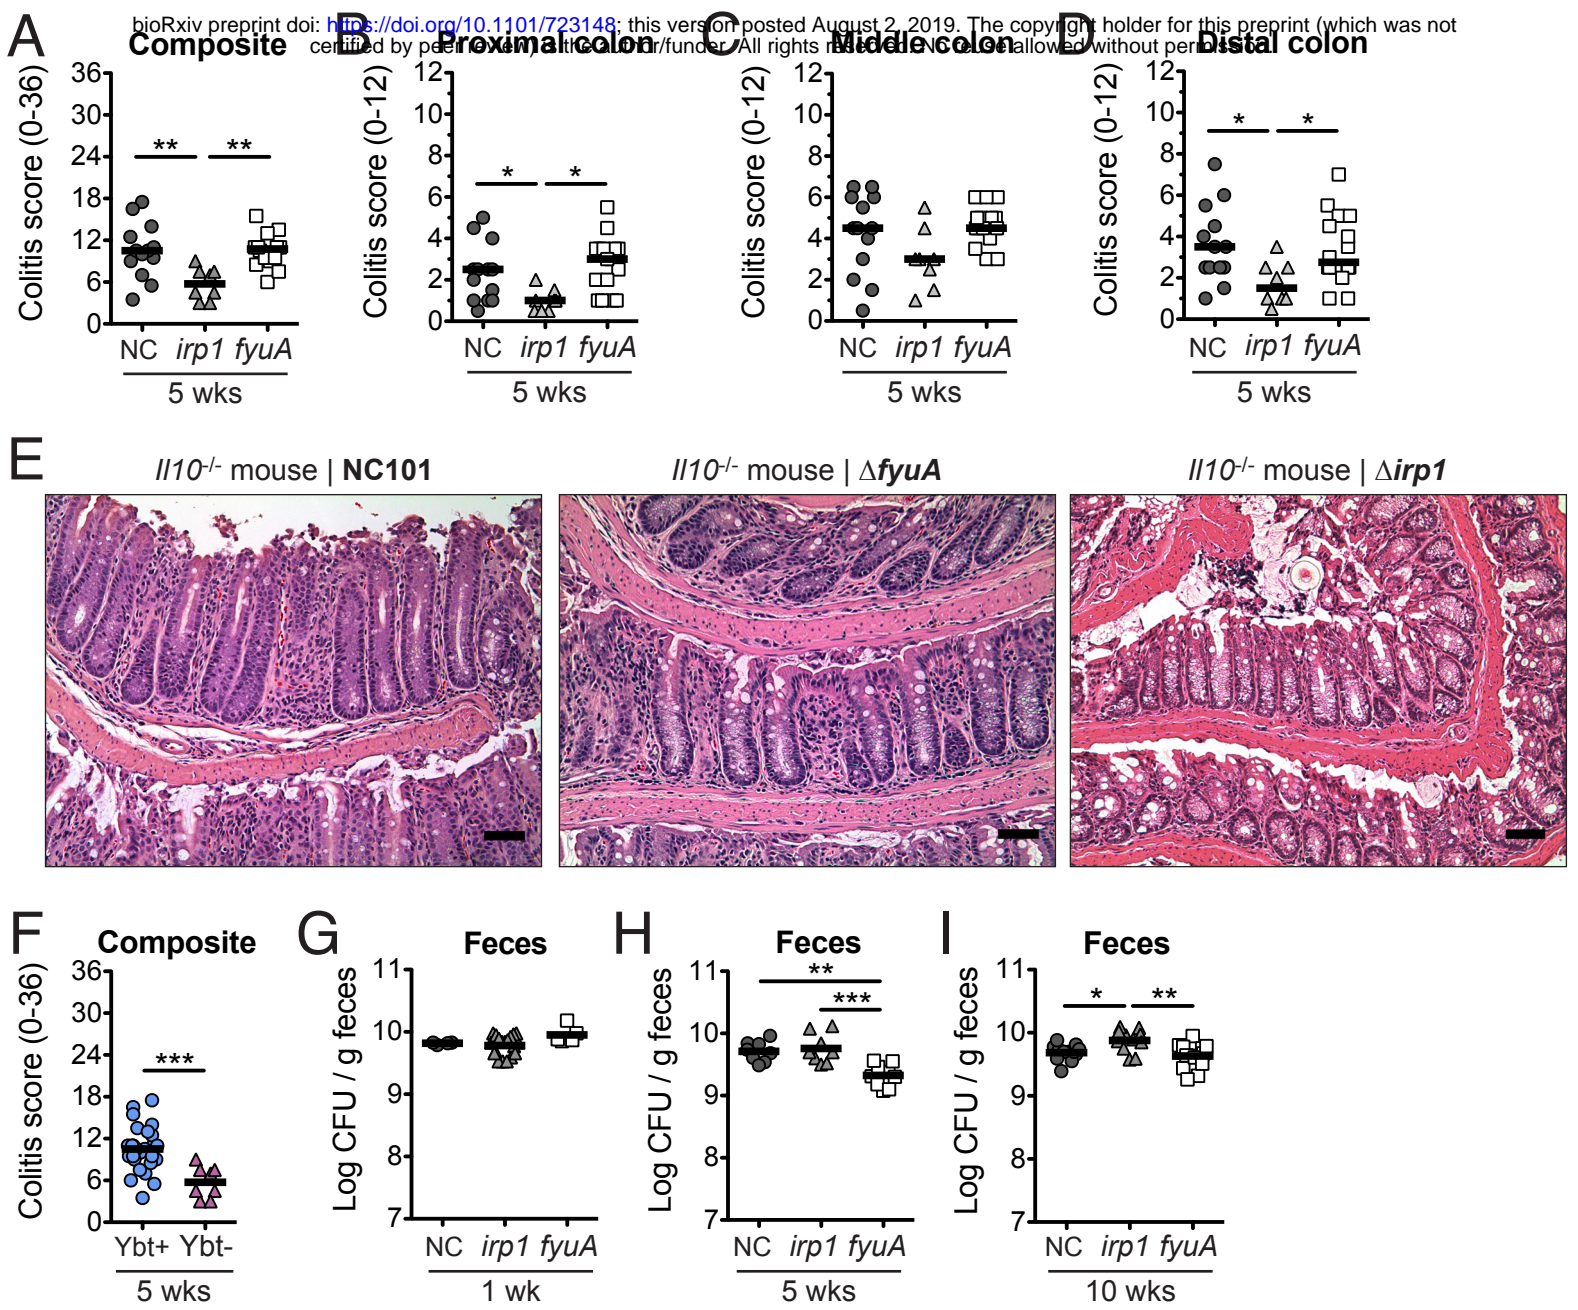

**A**

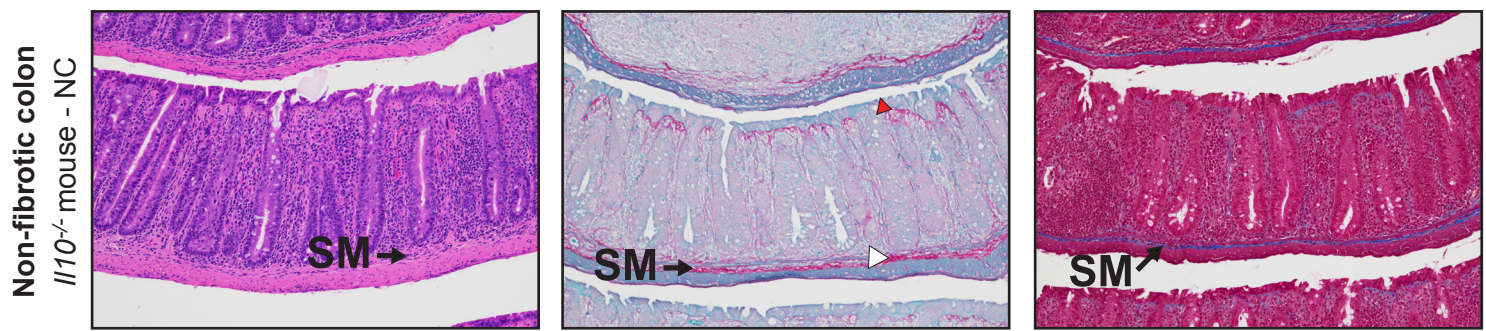

**B**

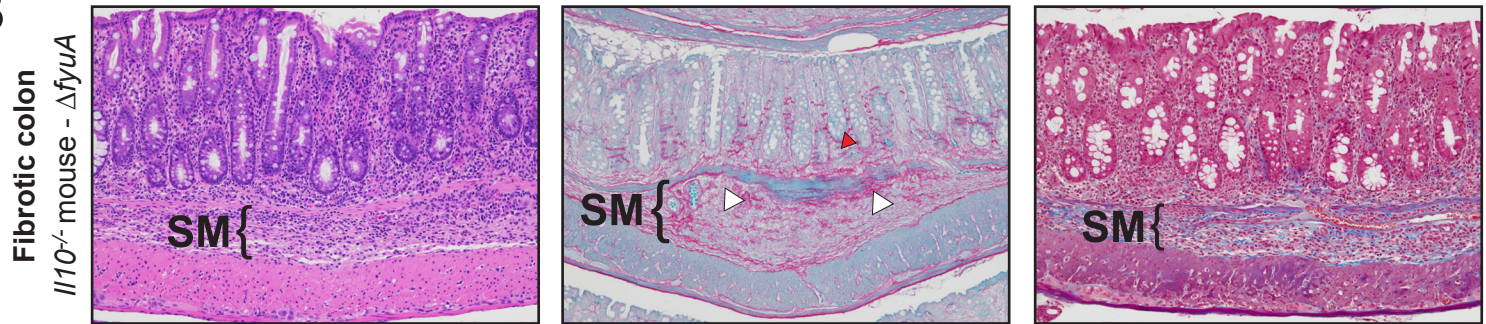

**C**

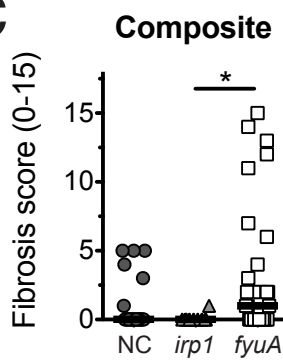

**D**

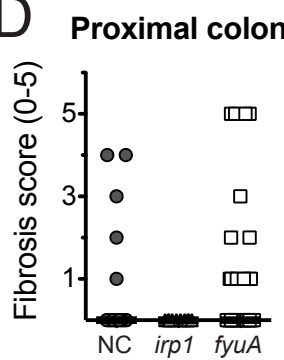

**E**

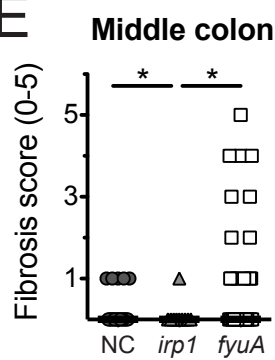

**F**

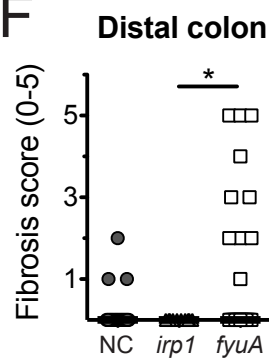

+1 for lamina propria involvement

4 75-100%  
3 50-75%  
2 25-50%  
1 1-25%  
0 No fibrosis

Submucosal involvement

**G**

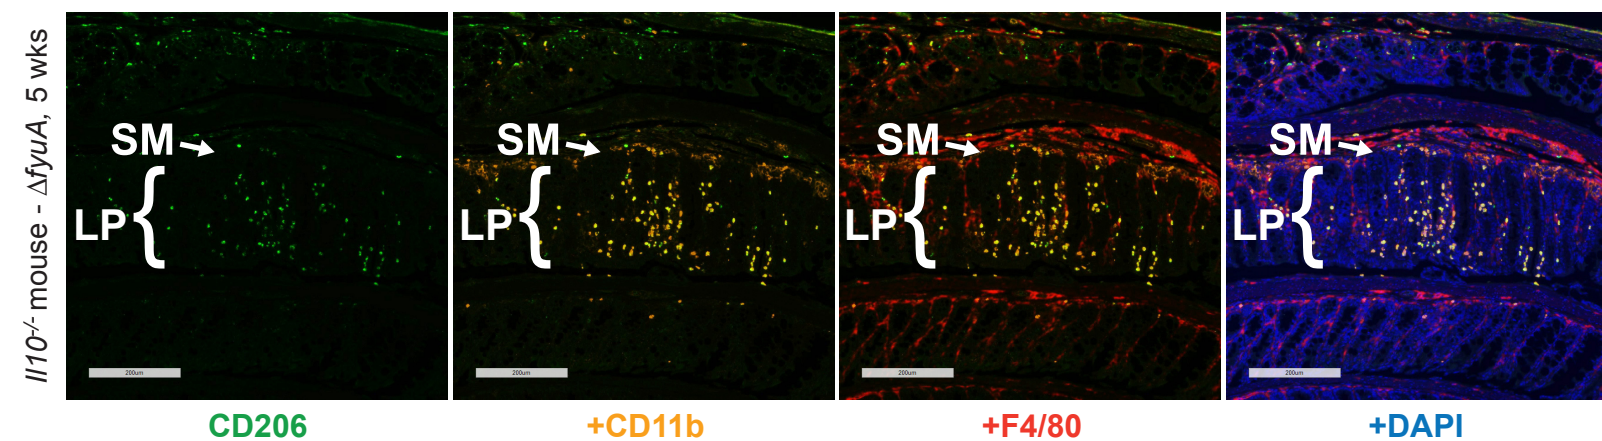

**A**

Fibrotic colon  
*Il10<sup>-/-</sup>* mouse

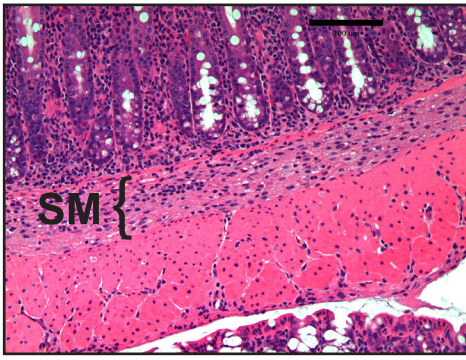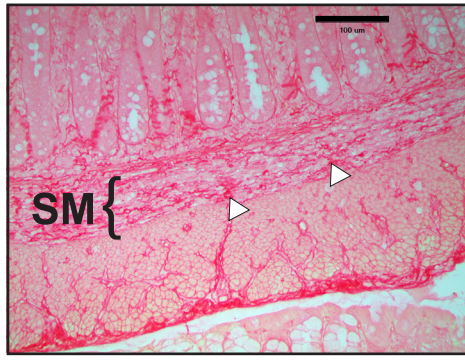

**B**

Fibrotic colon  
Human CD

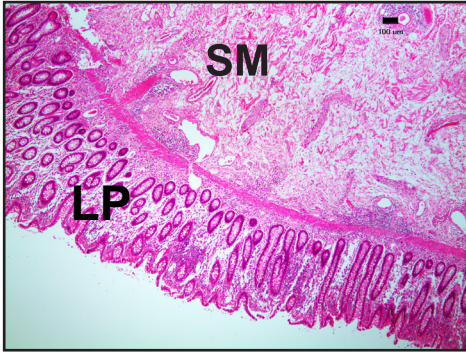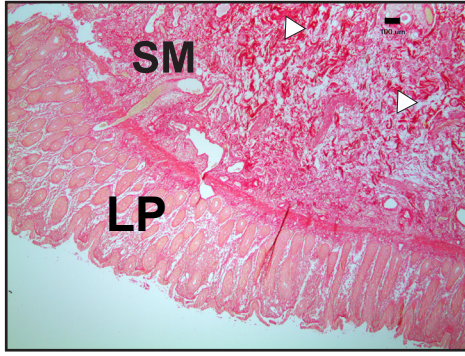

**C**

Fibrotic muscularis  
Human CD

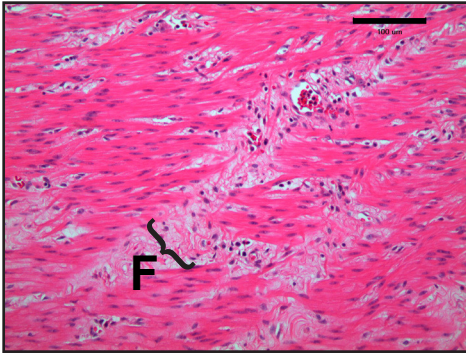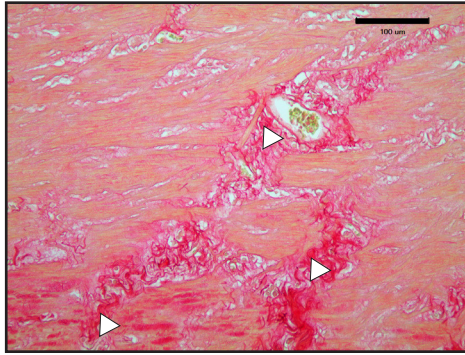

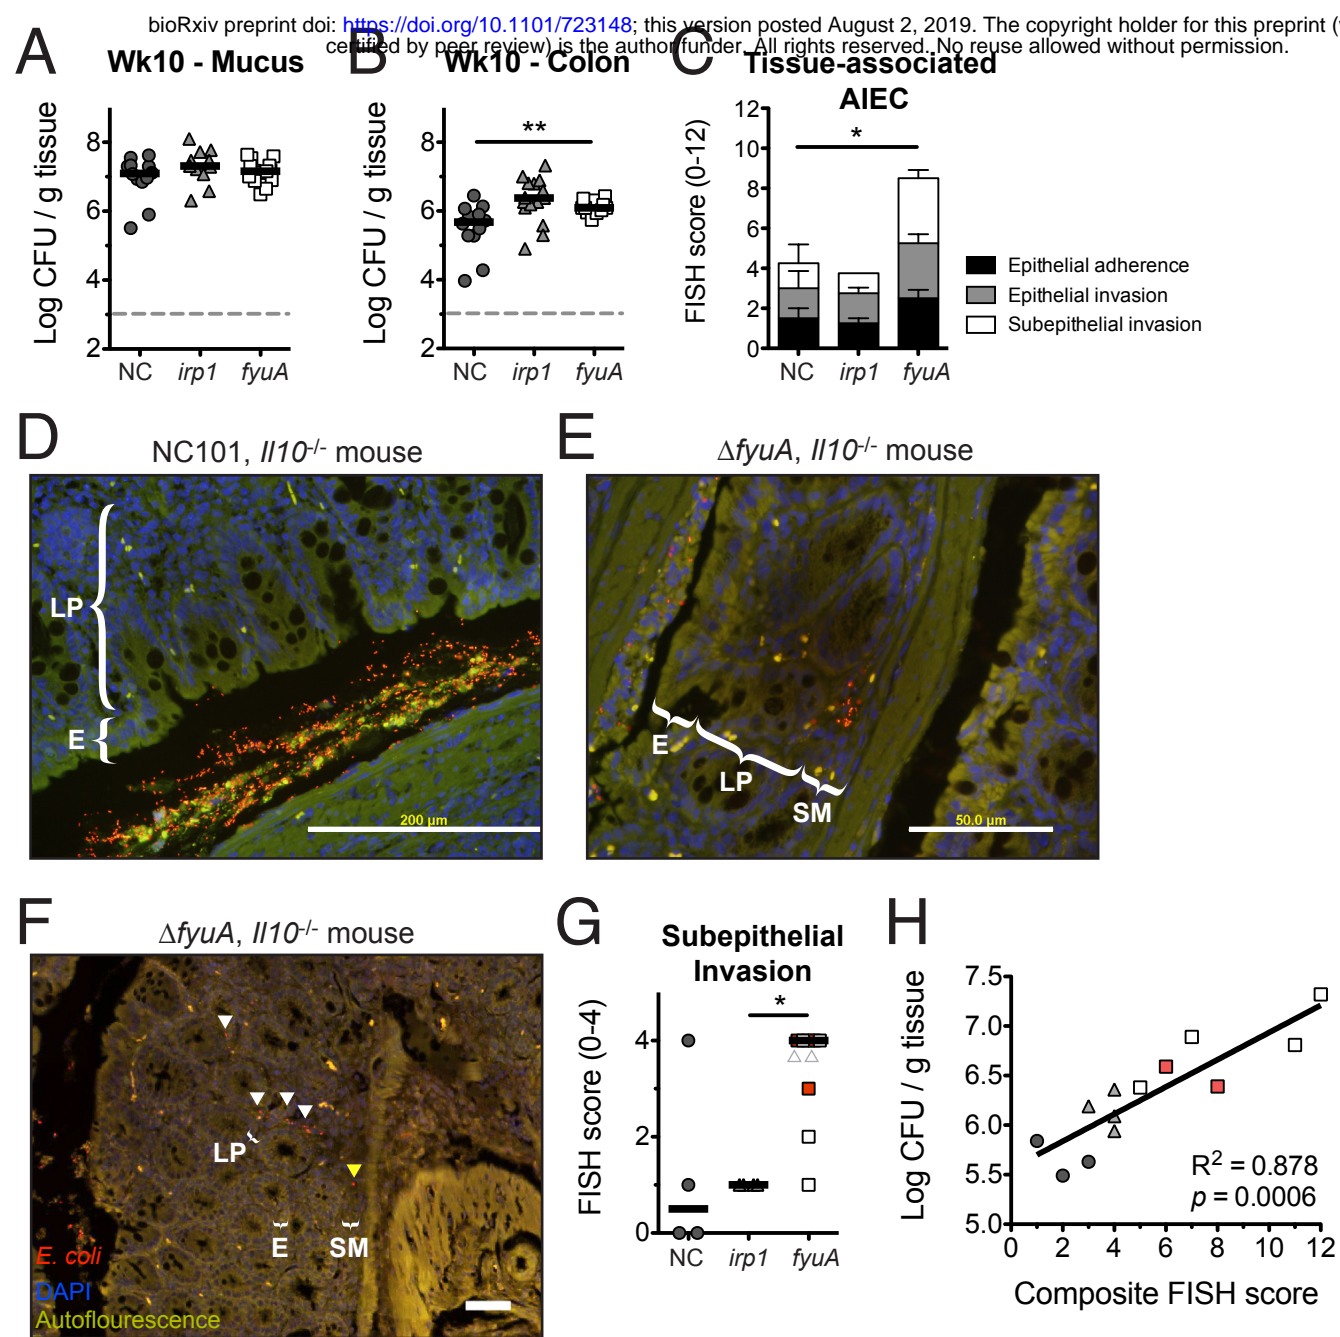

**A**

**10 wk**

By host & *E. coli* genotype

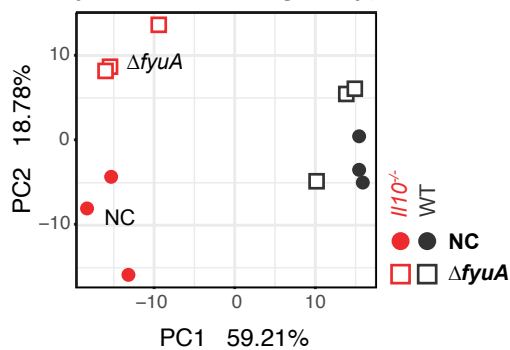

| <i>E. coli</i> strain |       | Mouse genotype |        |
|-----------------------|-------|----------------|--------|
| p-value               | FDR   | p-value        | FDR    |
| 0.830                 | 0.830 | 1.0e-7         | 2.9e-7 |
| 0.006                 | 0.019 | 0.816          | 0.990  |
| 0.198                 | 0.297 | 0.990          | 0.990  |

**B**

**5 wk in I/I0-/- mice**

By *E. coli* genotype

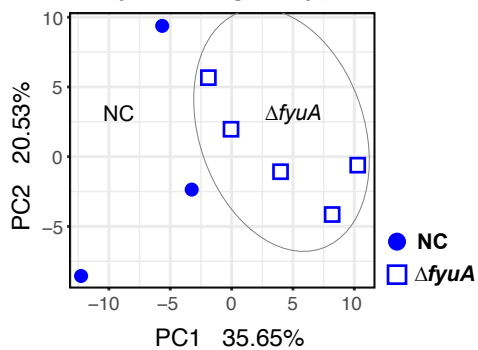

| <i>E. coli</i> strain |       |
|-----------------------|-------|
| p-value               | FDR   |
| PC1                   | 0.028 |
| PC2                   | 0.868 |
| PC3                   | 0.895 |

**C**

**5 & 10 wk in I/I0-/- mice**

By *E. coli* genotype

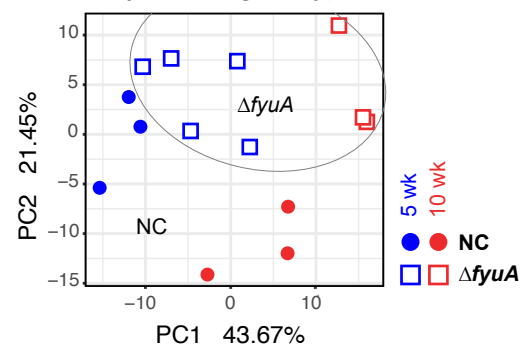

| <i>E. coli</i> strain |        | Time point |       |
|-----------------------|--------|------------|-------|
| p-value               | FDR    | p-value    | FDR   |
| PC1                   | 5.0e-4 | 0.044      | 0.131 |
| PC2                   | 0.011  | 0.102      | 0.153 |
| PC3                   | 0.947  | 0.517      | 0.517 |



A

ECM-receptor interactions pathway

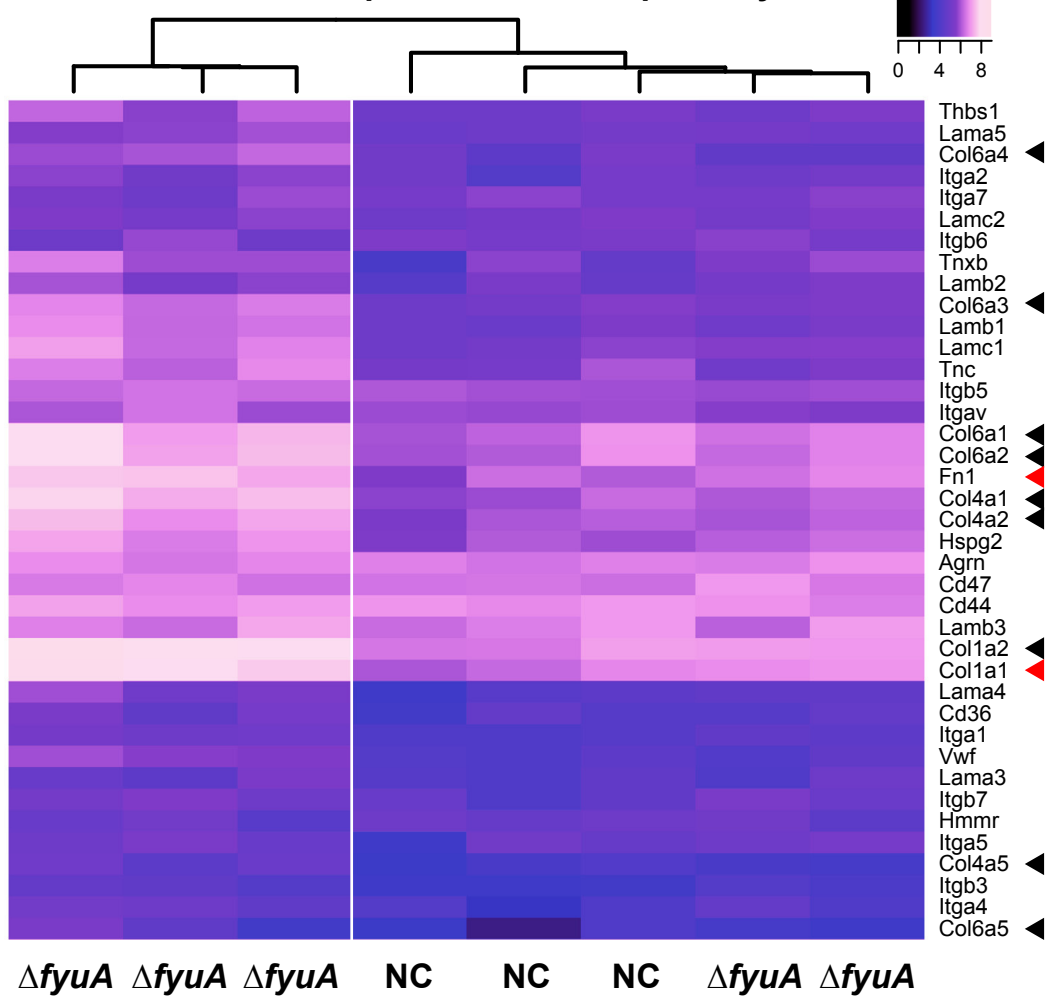

B

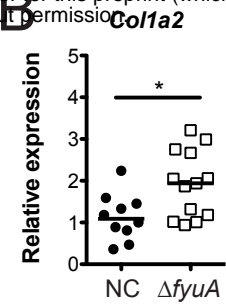

C

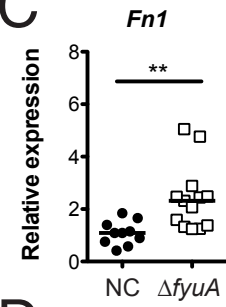

D

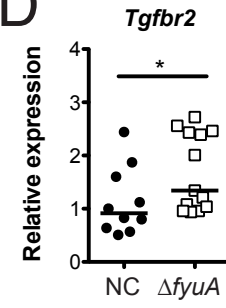

F

NC101, *Il10*<sup>-/-</sup> mouse

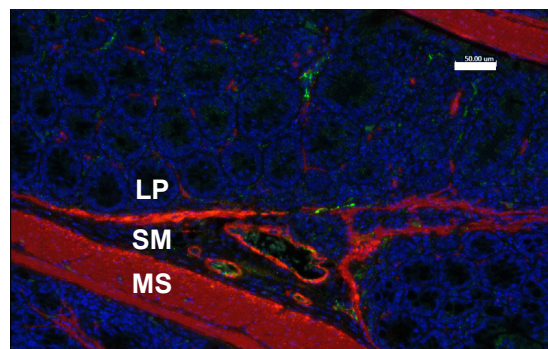

G

ΔfyuA, *Il10*<sup>-/-</sup> mouse

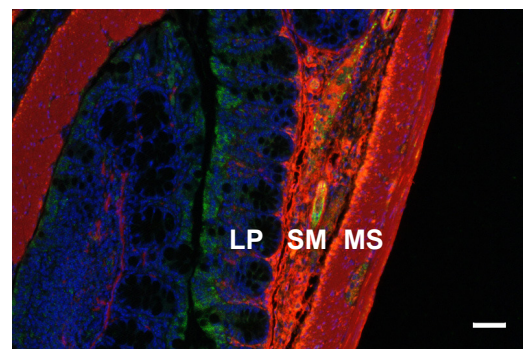

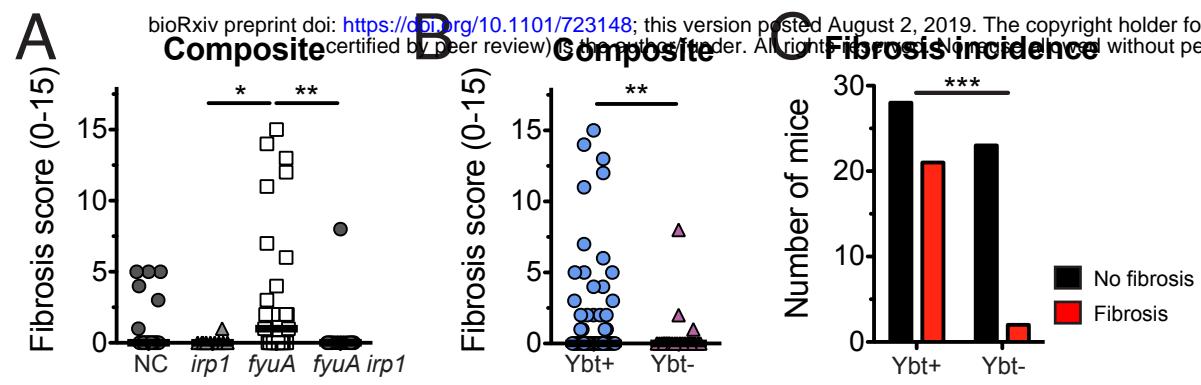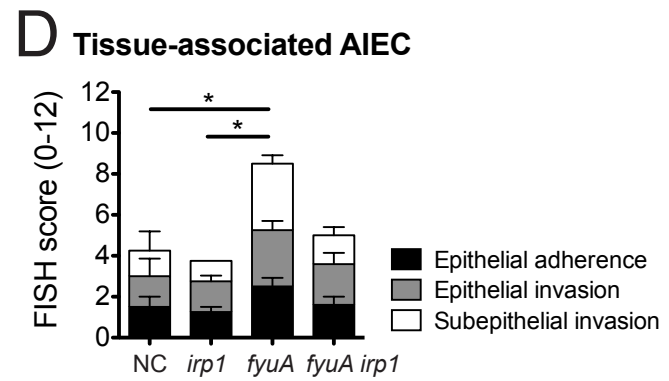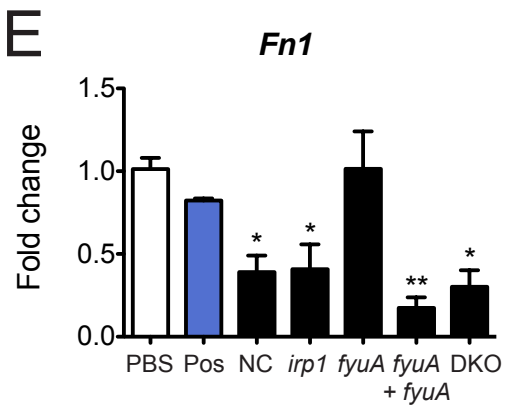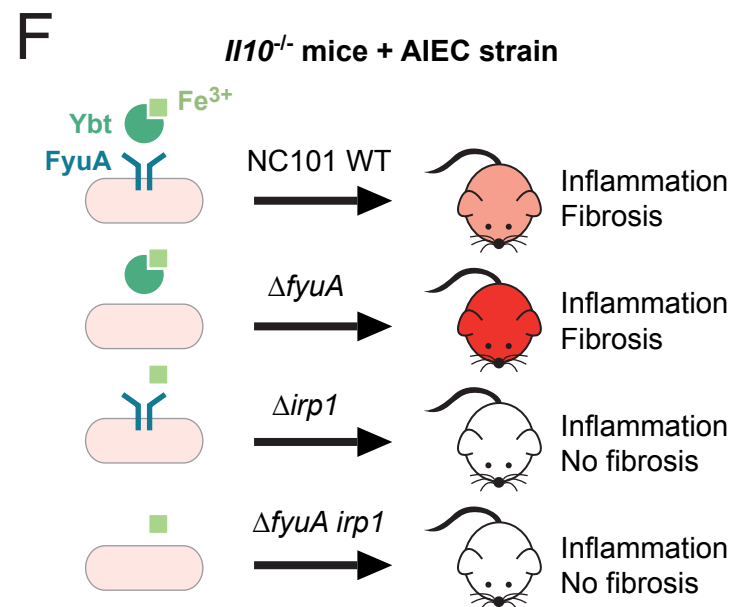

Source: https://www.biorxiv.org/content/10.1101/723148v1.full.pdf
